# Supplementary material for: The enzyme mechanism of patchoulol synthase
Source: publisher site journal article supplement (doi:10.3762/bjoc.18.2), 2022-01-03
Supplement: Additional file 1 [file 1860-5397-18-2-S1.pdf]

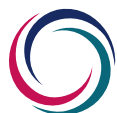

## Supporting Information

for

### The enzyme mechanism of patchoulol synthase

Houchao Xu, Bernd Goldfuss, Gregor Schnakenburg and Jeroen S. Dickschat

*Beilstein J. Org. Chem.* **2022**, *18*, 13–24. doi:10.3762/bjoc.18.2

### Experimental details, characterisation data and copies of spectra

### Isolation of patchoulol (3), pogostol (12) and (2S,3S,7S,10R)-guaia-1,11-dien-10-ol (17) from patchouli oil

Patchouli oil (10 g) was subjected to the silica gel column chromatography. Elution with a pentane/Et<sub>2</sub>O gradient (1:0, 4:1, and then 3:1) yielded 17 fractions. Fr. 10 (2.5 g) was identified as pure **3**. Fr. 11 (0.3 g) was chromatographed on silica gel using a mobile phase of pentane/Et<sub>2</sub>O 4:1 to obtain fractions 11A–11C. Fr. 11A (26 mg) and Fr. 11C (0.2 g) were further purified by preparative HPLC on a chiral stationary phase to give **17** (4 mg) and **12** (0.12 g), respectively.

**Patchoulol (3).** Yield: 2.5 g (from 10 g patchouli oil, 25%). TLC (pentane / diethyl ether = 1:1):  $R_f$  = 0.62. GC (HP5-MS):  $I$  = 1690. IR (diamond ATR):  $\tilde{\nu}$  / cm<sup>-1</sup> = 2934 (s), 2870 (s), 1467 (m), 1457 (m), 1376 (w), 1056 (w), 1040 (m), 1000 (w), 982 (w). HR-MS (ESI<sup>+</sup>): calc. for [C<sub>15</sub>H<sub>25</sub>]<sup>+</sup>  $m/z$  = 205.1951; found:  $m/z$  = 205.1950. Optical rotary power:  $[\alpha]_D^{25}$  = -102.8 (c 0.21, benzene). NMR data are given in Table S1.

**Pogostol (12).** Yield: 120 mg (from 10 g patchouli oil, 1.2%). TLC (pentane / diethyl ether = 1:1):  $R_f$  = 0.52. GC (HP5-MS):  $I$  = 1681. IR (diamond ATR):  $\tilde{\nu}$  / cm<sup>-1</sup> = 2947 (s), 2928 (s), 2870 (m), 1644 (w), 1454 (w), 1375 (w), 1103 (w), 1066 (w), 885 (m), 543 (w). HR-MS (ESI<sup>+</sup>): calc. for [C<sub>15</sub>H<sub>27</sub>O]<sup>+</sup>  $m/z$  = 223.2056; found:  $m/z$  = 223.2058. Optical rotary power:  $[\alpha]_D^{25}$  = -27.0 (c 0.10, benzene). NMR data are given in Table S4.

**(2S,3S,7S,10R)-Guaia-1,11-dien-10-ol (17).** Yield: 4 mg (from 10 g patchouli oil, 0.04%). TLC (pentane / diethyl ether = 1:1):  $R_f$  = 0.57. GC (HP5-MS):  $I$  = 1610. IR (diamond ATR):  $\tilde{\nu}$  / cm<sup>-1</sup> = 2960 (m), 2925 (s), 2871 (m), 1643 (w), 1448 (m), 1374 (w), 1028 (m), 886 (m), 812 (w), 670 (w). HR-MS (ESI<sup>+</sup>): calc. for [C<sub>15</sub>H<sub>27</sub>O]<sup>+</sup>  $m/z$  = 221.1900; found:  $m/z$  = 221.1904. Optical rotary power:  $[\alpha]_D^{25}$  = -7.7 (c 0.26, benzene). NMR data are given in Table 1 of main text.

### HPLC

Analytical scale HPLC separation was carried out using a PLATINblue series HPLC system (Knauer, Berlin, Germany), equipped with a PAD-1 photodiode array detector (190–1000 nm) and a KNAUER Eurospher II 100-3 C18 column (3.0  $\mu$ m; 2.0 mm  $\times$  100 mm). The UV-vis absorption was monitored at 190–600 nm.

Preparative scale HPLC purification was performed on an Azura series HPLC system (Knauer, Berlin, Germany) with a multiwavelength detector MWL 2.1L (190–700 nm) using a KNAUER Eurospher II 100-5 C18P column (5  $\mu$ m, 250  $\times$  16 mm).

### GC-MS

GC-MS analyses were carried out on a 7890B/5977A series gas chromatography-mass selective detector (Agilent, Santa Clara, CA, USA). The GC was equipped with an HP5-MS fused silica capillary column (30 m, 0.25 mm i.d., 0.50  $\mu$ m film; Agilent) and operated using the settings 1) inlet pressure: 77.1 kPa, He at 23.3 mL min<sup>-1</sup>, 2) injection volume: 1–2  $\mu$ L, 3) temperature program: 5 min at 50 °C then increasing 5 °C min<sup>-1</sup> to 320 °C, 4) 60 s valve time, and 5) carrier gas: He at 1.2 mL min<sup>-1</sup>. The MS was operated with settings 1) source: 230 °C, 2) transfer line: 250 °C, 3) quadrupole: 150 °C, and 4) electron energy: 70 eV.

### NMR spectroscopy

NMR spectra were recorded at 298 K on a Bruker (Billerica, MA, USA) Avance III HD Cryo (700 MHz) NMR spectrometer. Spectra were measured in C<sub>6</sub>D<sub>6</sub> and referenced against

solvent signals ( $^1\text{H}$  NMR, residual proton signal:  $\delta = 7.16$  ppm;  $^{13}\text{C}$  NMR:  $\delta = 128.06$  ppm).<sup>[1]</sup>

### IR spectroscopy

IR spectra were recorded on a Bruker  $\alpha$  infrared spectrometer with a diamond ATR probehead. Peak intensities are given as s (strong), m (medium), w (weak), and br (broad).

### Optical rotations

Optical rotations were recorded on a Modular Compact Polarimeter MCP 100 (Anton Paar, Graz, Austria). The temperature setting was 25 °C; the wavelength of the light used was 589 nm (sodium D line); the path-length was 10 cm, the compound concentrations  $c$  are given in g 100 mL<sup>-1</sup>.

### Gene expression and purification of PTS

A preculture of the *E. coli* transformants harbouring the plasmid pYE-AAS86323 was grown overnight at 37 °C in LB medium containing kanamycin (50  $\mu\text{g mL}^{-1}$ ). The expression cultures were then inoculated using 20 mL L<sup>-1</sup> of preculture, followed by culturing at 37 °C with shaking in TB medium (24.0 g L<sup>-1</sup> yeast extract, 20.0 g L<sup>-1</sup> tryptone, 4.0 mL L<sup>-1</sup> glycerol, 2.44 g L<sup>-1</sup>, KH<sub>2</sub>PO<sub>4</sub>, 12.5 g L<sup>-1</sup> K<sub>2</sub>HPO<sub>4</sub>) until an OD<sub>600</sub> = 0.4 was reached. The cultures were cooled to 18 °C and protein expression was induced by addition of IPTG (400 mM in water, 1 mL L<sup>-1</sup>). The expression cultures were shaken overnight at 18 °C and then centrifuged at 3.600g (4 °C). The supernatant was discarded and the cell pellet was resuspended in binding buffer (10 mL L<sup>-1</sup> culture; 20 mM Na<sub>2</sub>HPO<sub>4</sub>, 500 mM NaCl, 20 mM imidazole, 1 mM MgCl<sub>2</sub>, pH 7.4, 4 °C). The resulting suspension was subjected to ultrasonication for cell lysis. The cell debris was removed by centrifugation (14.610g, 15 min, 4 °C) and the supernatant was loaded onto a Ni<sup>2+</sup>-NTA affinity chromatography column (Super Ni-NTA, Generson, Slough, UK). The column was washed with binding buffer (2  $\times$  10 mL L<sup>-1</sup> culture), and the desired His-tagged protein was eluted using elution buffer (10 mL L<sup>-1</sup> culture, 20 mM Na<sub>2</sub>HPO<sub>4</sub>, 500 mM NaCl, 500 mM imidazole, 1 mM MgCl<sub>2</sub>, pH 7.4, 4 °C). Fractions containing protein were pooled, analysed by Bradford assay to determine the protein concentration (6 mg mL<sup>-1</sup>) and by SDS-PAGE (Figure S1), and used for incubation experiments.

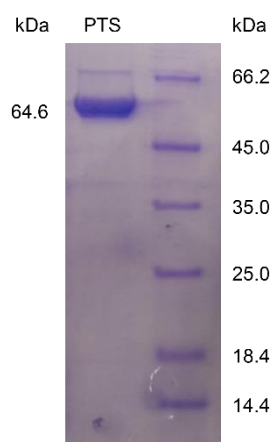

**Figure S1:** SDS-PAGE analysis of purified recombinant PTS.

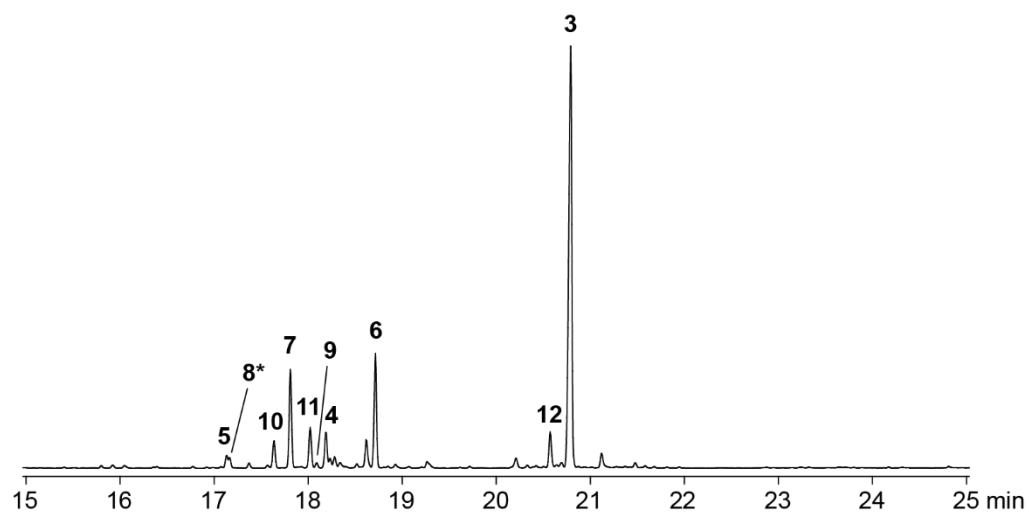

**Figure S2:** Total ion chromatogram of an extract from the incubation of FPP with PTS. Numbers at peaks refer to compound numbers in Figure 1 of main text. Germacrene A (**8**) was detected as its Cope rearrangement product  $\beta$ -elemene (**8\***).

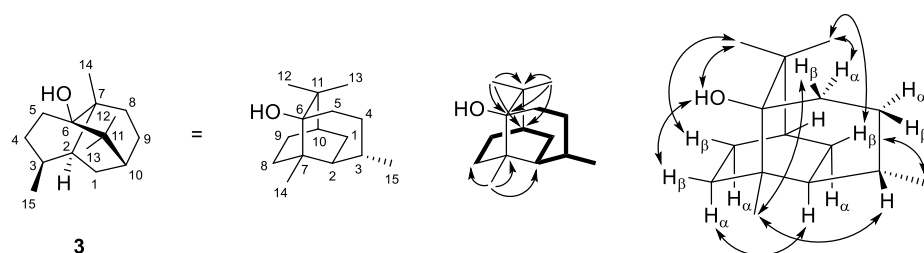

**Figure S3:** Structure elucidation of **3**. Bold:  $^1\text{H}$ ,  $^1\text{H}$ -COSY, single-headed arrows: key HMBC, and double-headed arrows: key NOESY correlations.

**Table S1:** NMR data of patchoulol (**3**) in  $\text{C}_6\text{D}_6$  recorded at 298 K.

| $\text{C}^{[\text{a}]}$ | type          | $^{13}\text{C}^{[\text{b}]}$ | $^1\text{H}^{[\text{b}]}$                                                             |
|-------------------------|---------------|------------------------------|---------------------------------------------------------------------------------------|
| 1                       | $\text{CH}_2$ | 24.95                        | 1.37 (m, $\text{H}_\beta$ )<br>1.16 (m, $\text{H}_\alpha$ )                           |
| 2                       | CH            | 43.88                        | 1.28 (m)                                                                              |
| 3                       | CH            | 28.44                        | 1.82 (m)                                                                              |
| 4                       | $\text{CH}_2$ | 28.96                        | 1.27 (m, 2H)                                                                          |
| 5                       | $\text{CH}_2$ | 33.22                        | 1.58 (dd, $J = 13.6, 5.4$ , $\text{H}_\alpha$ )<br>1.34 (m, $\text{H}_\beta$ )        |
| 6                       | $\text{C}_q$  | 75.01                        | —                                                                                     |
| 7                       | $\text{C}_q$  | 37.89                        | —                                                                                     |
| 8                       | $\text{CH}_2$ | 29.18                        | 1.92 (ddd, $J = 13.6, 11.4, 7.6$ , $\text{H}_\beta$ )<br>0.96 (m, $\text{H}_\alpha$ ) |
| 9                       | $\text{CH}_2$ | 24.79                        | 1.86 (m, $\text{H}_\beta$ )<br>1.16 (m, $\text{H}_\alpha$ )                           |
| 10                      | CH            | 39.51                        | 1.06 (m)                                                                              |
| 11                      | $\text{C}_q$  | 40.40                        | —                                                                                     |
| 12                      | $\text{CH}_3$ | 27.30                        | 1.09 (s)                                                                              |
| 13                      | $\text{CH}_3$ | 24.55                        | 1.00 (s)                                                                              |
| 14                      | $\text{CH}_3$ | 20.89                        | 0.80 (s)                                                                              |
| 15                      | $\text{CH}_3$ | 18.81                        | 0.74 (d, $J = 6.7$ )                                                                  |
|                         | OH            | —                            | 0.57 (br s)                                                                           |

[a] Carbon numbering as shown in Figure S3. [b] Chemical shifts  $\delta$  in ppm; multiplicity: s = singlet, d = doublet, m = multiplet, br = broad; coupling constants  $J$  are given in Hertz.

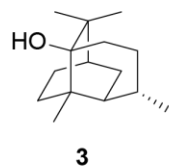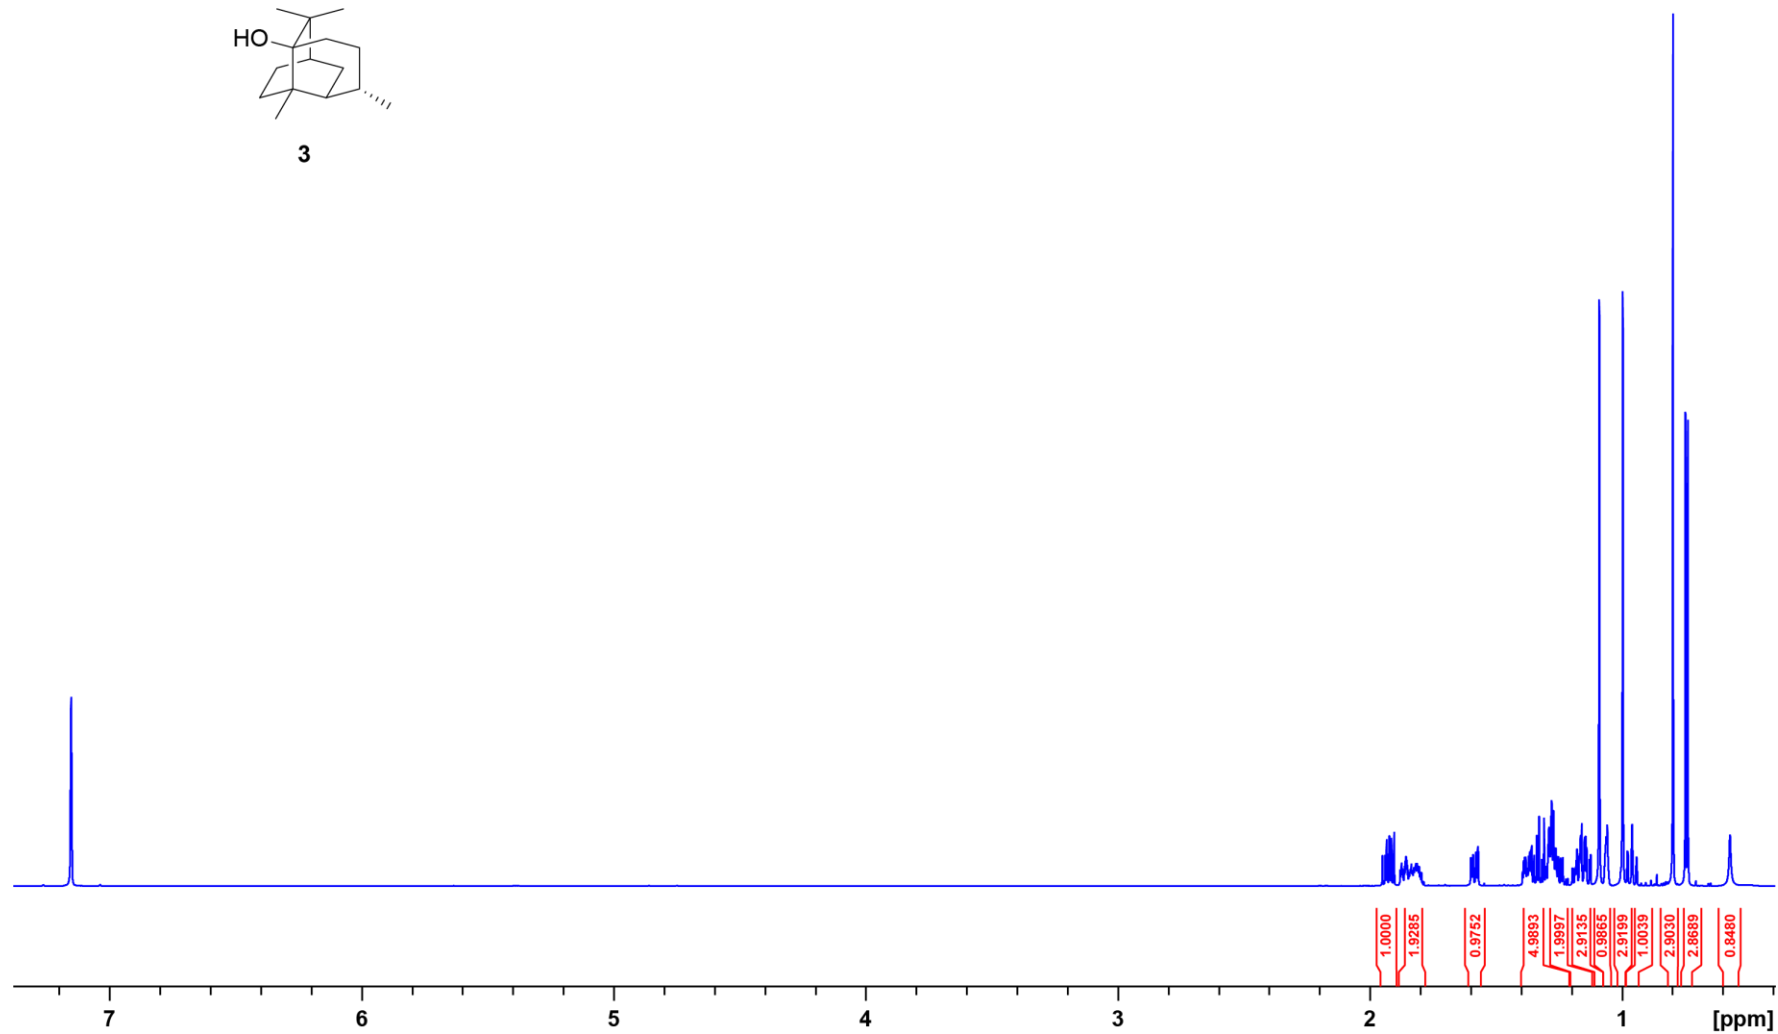

**Figure S4:** <sup>1</sup>H NMR spectrum of **3** (700 MHz, C<sub>6</sub>D<sub>6</sub>).

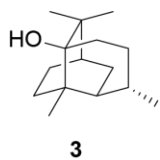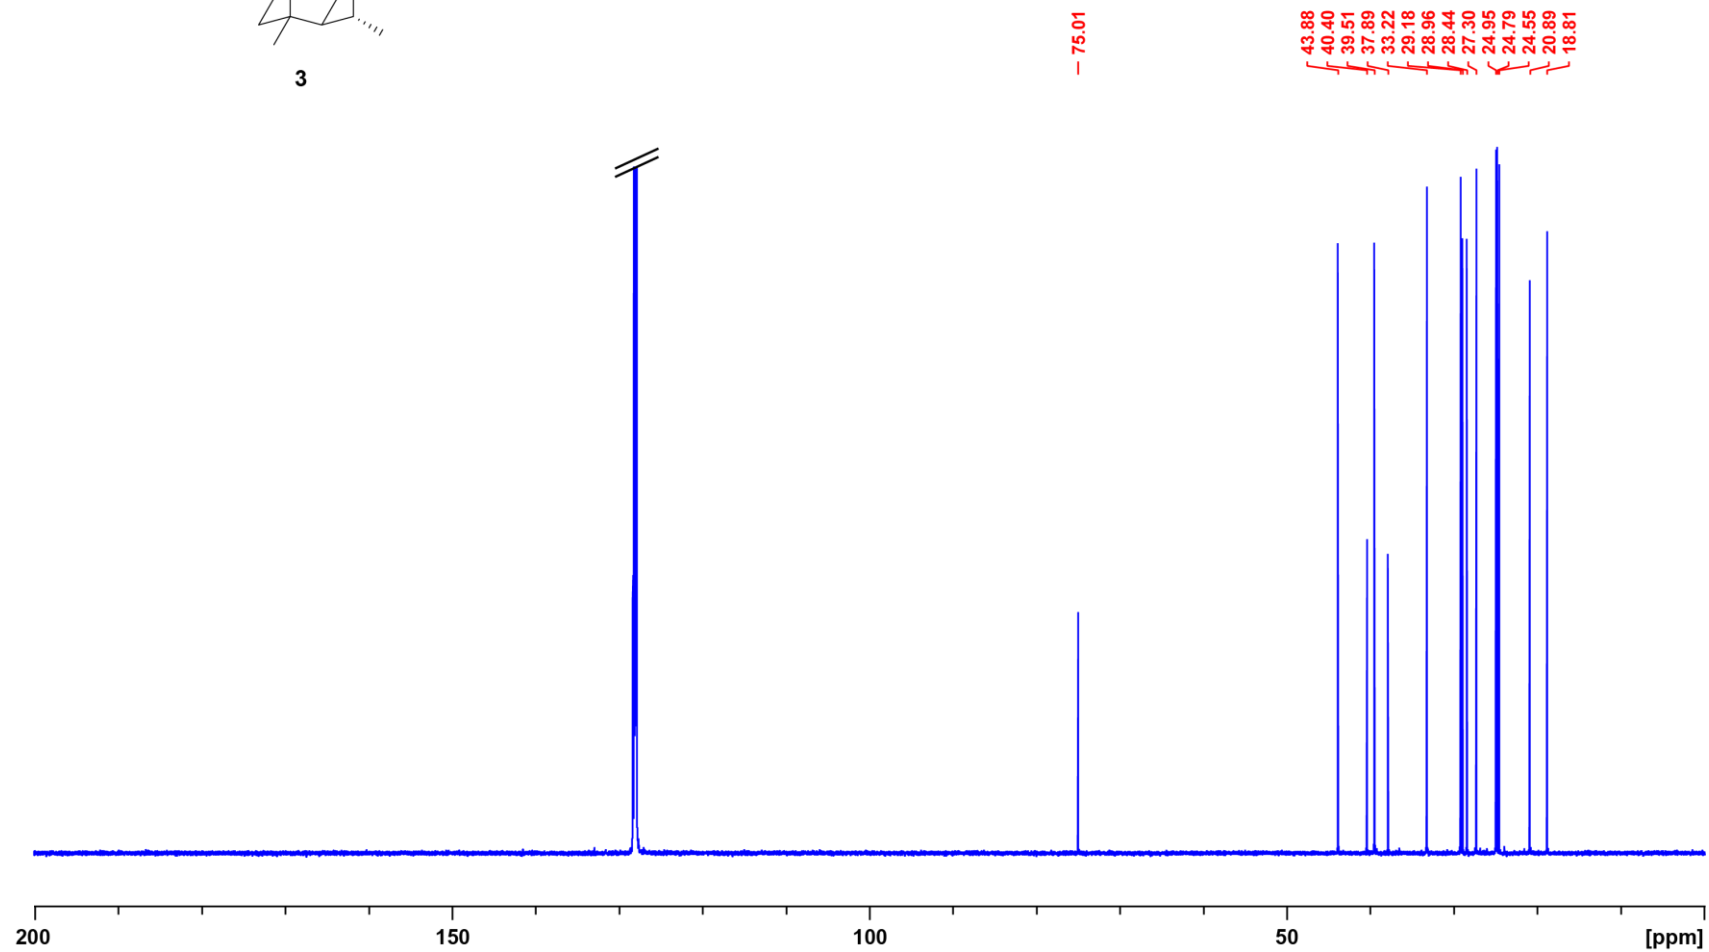

**Figure S5:**  $^{13}\text{C}$  NMR spectrum of **3** (176 MHz,  $\text{C}_6\text{D}_6$ ).

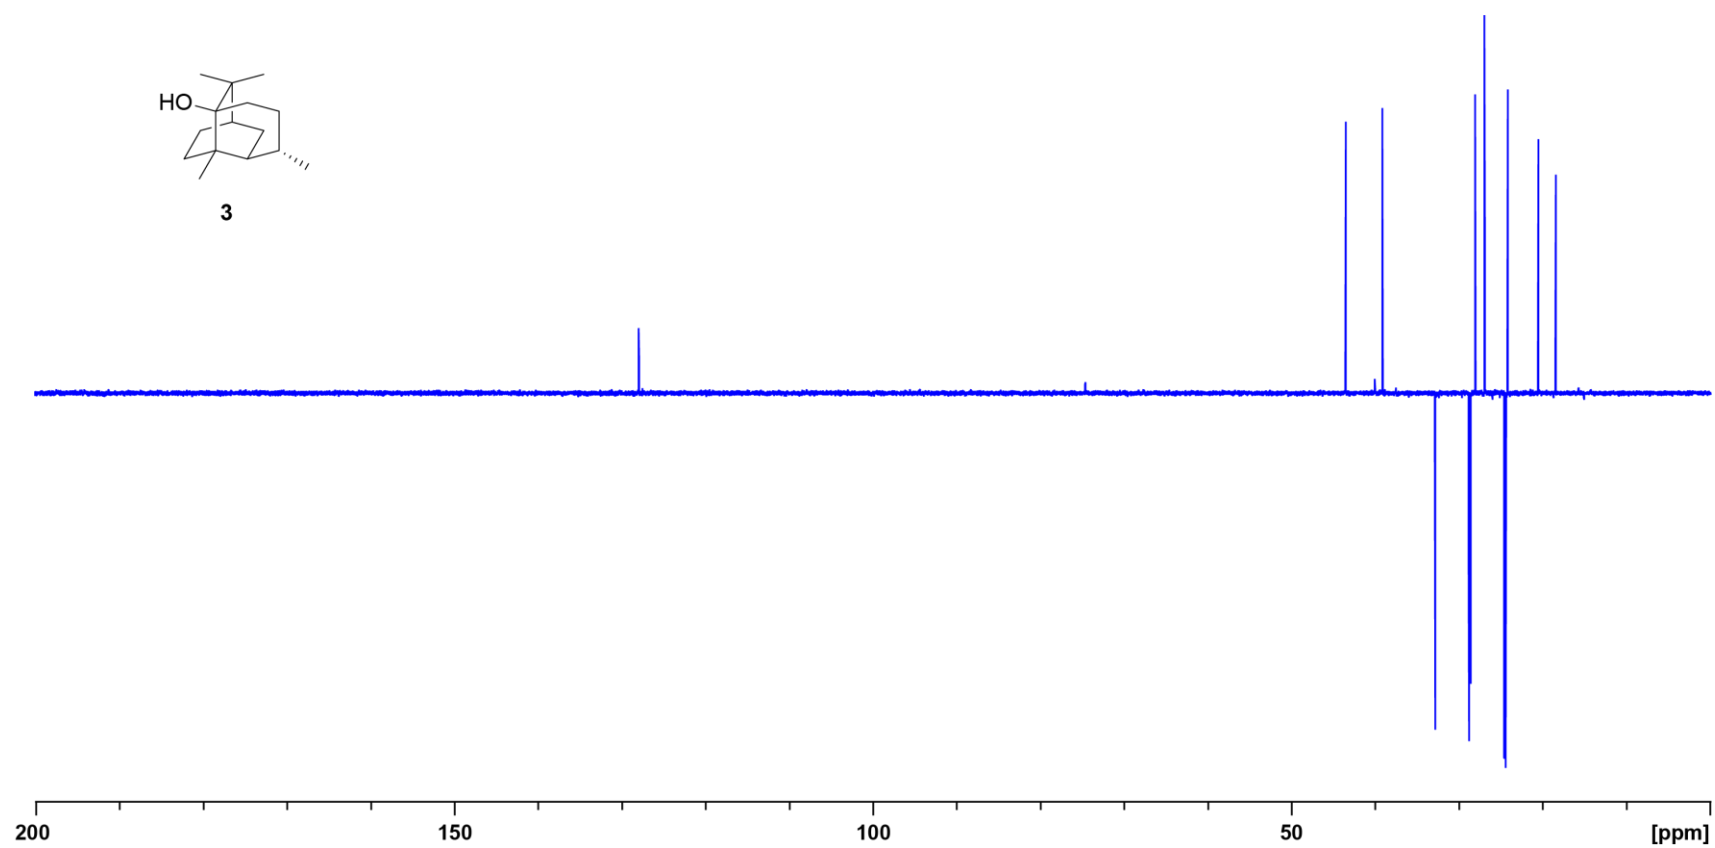

**Figure S6:**  $^{13}\text{C}$ -DEPT spectrum of **3** (176 MHz,  $\text{C}_6\text{D}_6$ ).





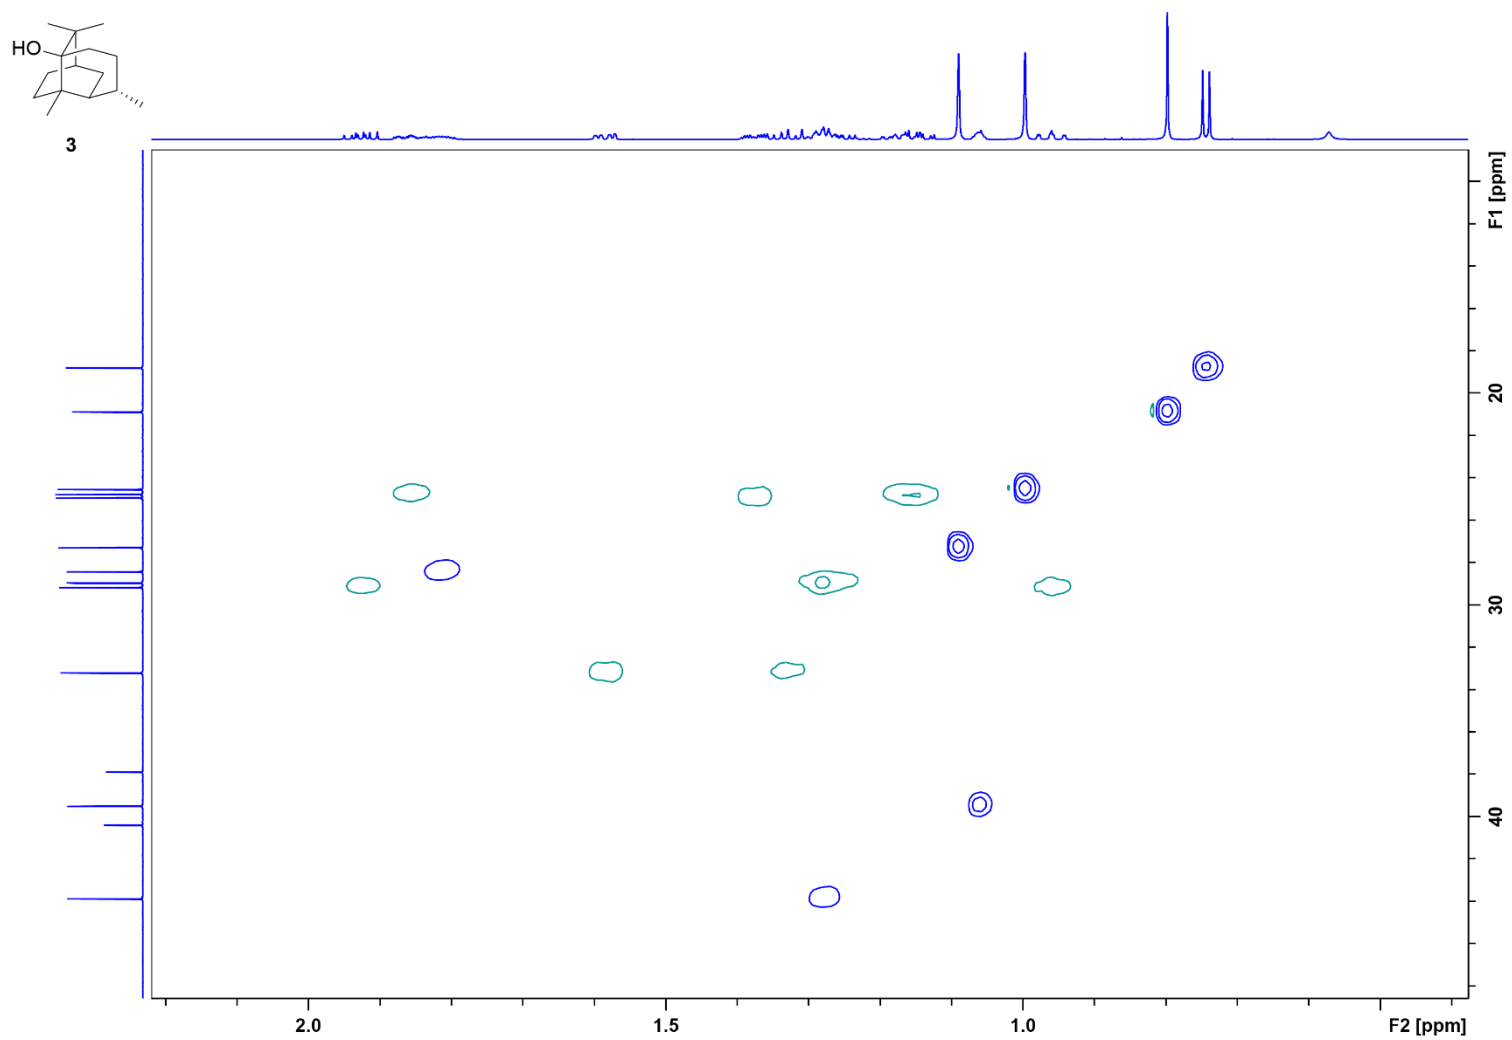

**Figure S8:** HSQC spectrum of **3** ( $\text{C}_6\text{D}_6$ ).

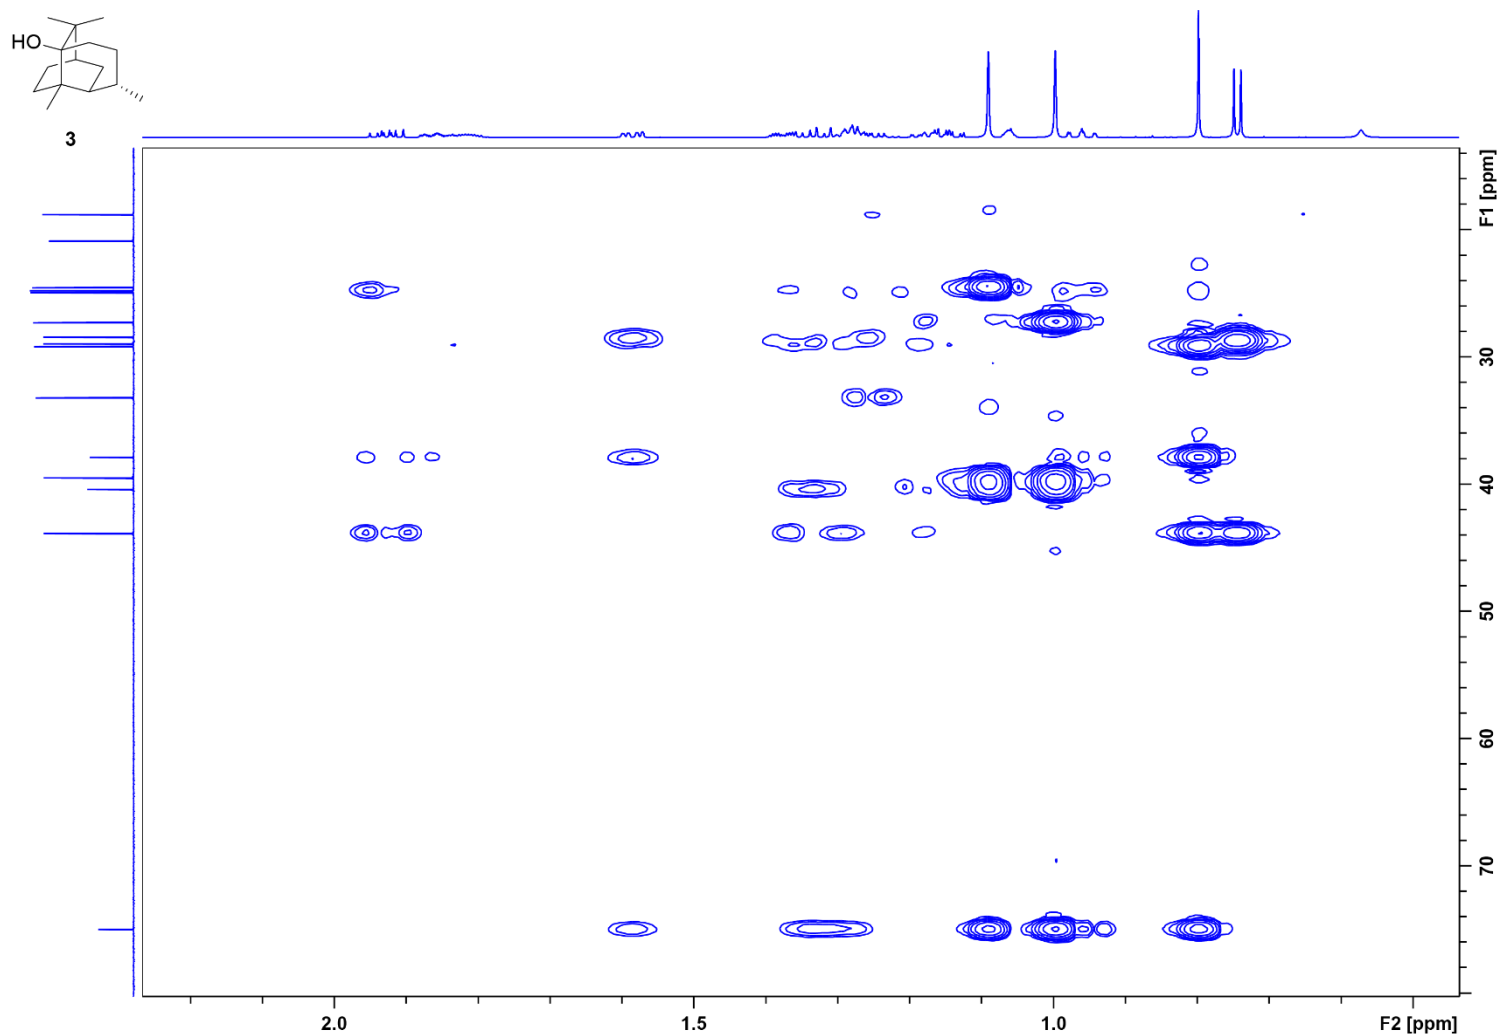

**Figure S9:** HMBC spectrum of **3** ( $C_6D_6$ ).

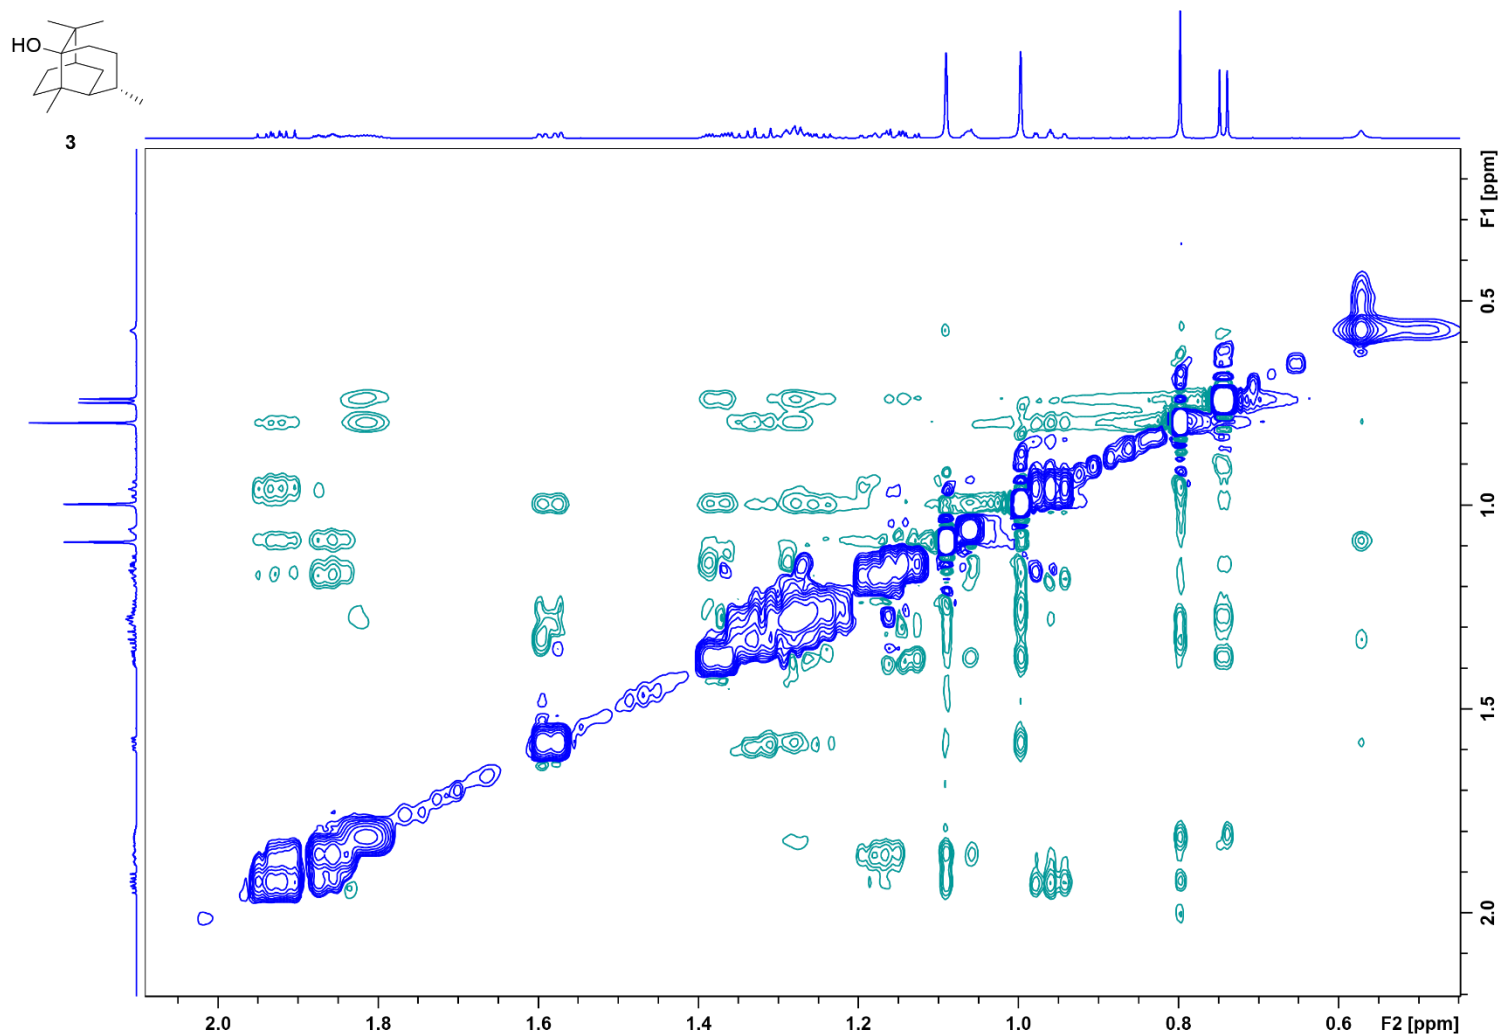

**Figure S10:** NOESY spectrum of **3** (C<sub>6</sub>D<sub>6</sub>).

### Crystal structure determination of 3

Suitable colourless plate-like single crystals were grown by recrystallisation from pentane/diethyl ether 4:1 upon standing at  $-20\text{ }^{\circ}\text{C}$ .

The data collection was performed on a Bruker D8-Venture diffractometer (area detector Photon I) using Cu  $K\alpha$  irradiation ( $\lambda = 1.54178\text{ \AA}$ ). The diffractometer was equipped with a low-temperature device (Oxford Cryostream 800er series, Oxford Cryosystems; set to 100K). Intensities were measured by fine-slicing  $\omega$  and  $\varphi$ -scans and corrected for background, polarization, and Lorentz effects. A semi-empirical absorption correction was applied for the data set [2]. The structures were solved by direct methods and refined anisotropically by the least-square procedure implemented in the SHELX program system [3]. Hydrogen atoms were included using the riding model on the bound carbon atoms. The absolute configuration was estimated according to the Flack parameter of  $-0.1(2)$  and further investigated by determining quantitative estimates for the reliability of our assignment by using Bayesian statistics on Bijvoet differences by Hooft et al [4].

According to this the probability of the correct assignment of the absolute configuration assuming an enantiopure compound was determined to  $P2(\text{true}) = 1.000$ . The probability parameter of the correct assignment of the absolute configuration including the option of potential racemic twinning was determined to  $P3(\text{true}) = 0.960$ , whereas the probability of incorrect assignment is  $P3(\text{false}) = 0.6 \cdot 10^{-5}$ .

**Table S2:** X-ray data of **3**.

|                                             |                                                                                                     |
|---------------------------------------------|-----------------------------------------------------------------------------------------------------|
| crystal habitus                             | clear colourless plate                                                                              |
| device type                                 | Bruker D8 Venture                                                                                   |
| empirical formula                           | C <sub>15</sub> H <sub>26</sub> O                                                                   |
| moiety formula                              | C <sub>15</sub> H <sub>26</sub> O                                                                   |
| formula weight                              | 222.36 g mol <sup>-1</sup>                                                                          |
| T / K                                       | 100.0                                                                                               |
| crystal system                              | hexagonal                                                                                           |
| space group                                 | P6 <sub>3</sub>                                                                                     |
| a / Å                                       | 16.1658(6)                                                                                          |
| b / Å                                       | 16.1658(6)                                                                                          |
| c / Å                                       | 8.8956(4)                                                                                           |
| α / °                                       | 90                                                                                                  |
| β / °                                       | 90                                                                                                  |
| γ / °                                       | 120                                                                                                 |
| V / Å <sup>3</sup>                          | 2013.26(17)                                                                                         |
| Z                                           | 6                                                                                                   |
| ρ <sub>calc</sub> / g cm <sup>-3</sup>      | 1.100                                                                                               |
| μ / mm <sup>-1</sup>                        | 0.498                                                                                               |
| F(000)                                      | 744.0                                                                                               |
| crystal size / mm <sup>3</sup>              | 0.18 × 0.06 × 0.03                                                                                  |
| absorption correction                       | empirical                                                                                           |
| T <sub>min</sub> ; T <sub>max</sub>         | 0.3194; 0.7535                                                                                      |
| radiation                                   | CuKα (λ = 1.54178)                                                                                  |
| 2θ range for data collection / °            | 10.946 to 135.496°                                                                                  |
| completeness to θ                           | 0.989                                                                                               |
| index ranges                                | -18 ≤ h ≤ 17, -18 ≤ k ≤ 17, -10 ≤ l ≤ 10                                                            |
| reflections collected                       | 9538                                                                                                |
| independent reflections                     | 2356 [R <sub>int</sub> = 0.0931, R <sub>sigma</sub> = 0.0711]                                       |
| data / restraints / parameters              | 2356 / 25 / 150                                                                                     |
| goodness-of-fit on F <sup>2</sup>           | 1.117                                                                                               |
| final R indexes [I ≥ 2σ (I)]                | R <sub>1</sub> = 0.0611, wR <sub>2</sub> = 0.1385                                                   |
| final R indexes [all data]                  | R <sub>1</sub> = 0.0674, wR <sub>2</sub> = 0.1415                                                   |
| largest diff. peak/hole / e Å <sup>-3</sup> | 0.26/-0.26                                                                                          |
| Flack parameter                             | -0.1(2)                                                                                             |
| Hoof parameter(s)                           | 0.0(2); P2(true) = 1.000 / P3(true) = 0.960 /<br>P3(twin) = 0.04 / P3(false) = 0.6·10 <sup>-5</sup> |
| CCDC deposition number                      | CCDC 2118370                                                                                        |

### Isotopic labelling experiments

Isotopic labelling experiments were performed with the substrates and enzymes as listed in Table S3. The reaction mixtures contained substrates (1 mg each) in aqueous  $\text{NH}_4\text{HCO}_3$  solution (1 mL, 25 mM), enzyme elution fractions (2 mL each) and incubation buffer (5 mL, 50 mM Tris, 10 mM  $\text{MgCl}_2$ , 20 vol % glycerol, pH 8.2). After incubation with shaking at 28 °C overnight, the reaction mixtures were extracted with *n*-hexane (0.15 mL, entries 5 and 11) or  $\text{C}_6\text{D}_6$  (0.6 mL + 0.2 mL, all other entries of Table S3). The extracts were dried with  $\text{MgSO}_4$  and analysed by GC–MS and/or NMR.

**Table S3:** Labelling experiments with PTS.

| entry | substrate                                                                        | enzymes                       | results shown in    |
|-------|----------------------------------------------------------------------------------|-------------------------------|---------------------|
| 1     | DMAPP + ( <i>E</i> )-(4- $^{13}\text{C}$ ,4- $^2\text{H}$ )IPP <sup>[5]</sup>    | FPPS, <sup>[6]</sup> PTS      | Figures S11 and S21 |
| 2     | DMAPP + ( <i>Z</i> )-(4- $^{13}\text{C}$ ,4- $^2\text{H}$ )IPP <sup>[5]</sup>    | FPPS, PTS                     | Figures S11 and S21 |
| 3     | ( <i>R</i> )-(1- $^{13}\text{C}$ ,1- $^2\text{H}$ )IPP <sup>[7]</sup>            | IDI, <sup>[7]</sup> FPPS, PTS | Figures S12 and S22 |
| 4     | ( <i>S</i> )-(1- $^{13}\text{C}$ ,1- $^2\text{H}$ )IPP <sup>[7]</sup>            | IDI, FPPS, PTS                | Figures S12 and S22 |
| 5     | FPP in $^2\text{H}_2\text{O}$                                                    | PTS                           | Figure S23          |
| 6     | (3- $^{13}\text{C}$ )FPP <sup>[8]</sup> in $^2\text{H}_2\text{O}$                | PTS                           | Figure S24          |
| 7     | (12- $^{13}\text{C}$ )FPP <sup>[8]</sup> in $^2\text{H}_2\text{O}$               | PTS                           | Figure S24          |
| 8     | (9- $^{13}\text{C}$ )GPP <sup>[9]</sup> + IPP in $^2\text{H}_2\text{O}$          | FPPS, PTS                     | Figure S24          |
| 9     | (12- $^{13}\text{C}$ )FPP                                                        | PTS                           | Figure S24          |
| 10    | (9- $^{13}\text{C}$ )GPP + IPP                                                   | FPPS, PTS                     | Figure S24          |
| 11    | (2- $^2\text{H}$ )GPP <sup>[9]</sup> + IPP                                       | FPPS, PTS                     | Figure S25          |
| 12    | (2- $^2\text{H}$ )GPP + (3- $^{13}\text{C}$ )IPP <sup>[10]</sup>                 | FPPS, PTS                     | Figure S26          |
| 13    | (3- $^{13}\text{C}$ ,2- $^2\text{H}$ )FPP <sup>[11]</sup>                        | PTS                           | Figure S27          |
| 14    | (2- $^2\text{H}$ )GPP + (2- $^{13}\text{C}$ )IPP <sup>[10]</sup>                 | FPPS, PTS                     | Figure S27          |
| 15    | (2- $^2\text{H}$ )FPP <sup>[10]</sup> + (15- $^{13}\text{C}$ )FPP <sup>[8]</sup> | PTS                           | Figure S28          |

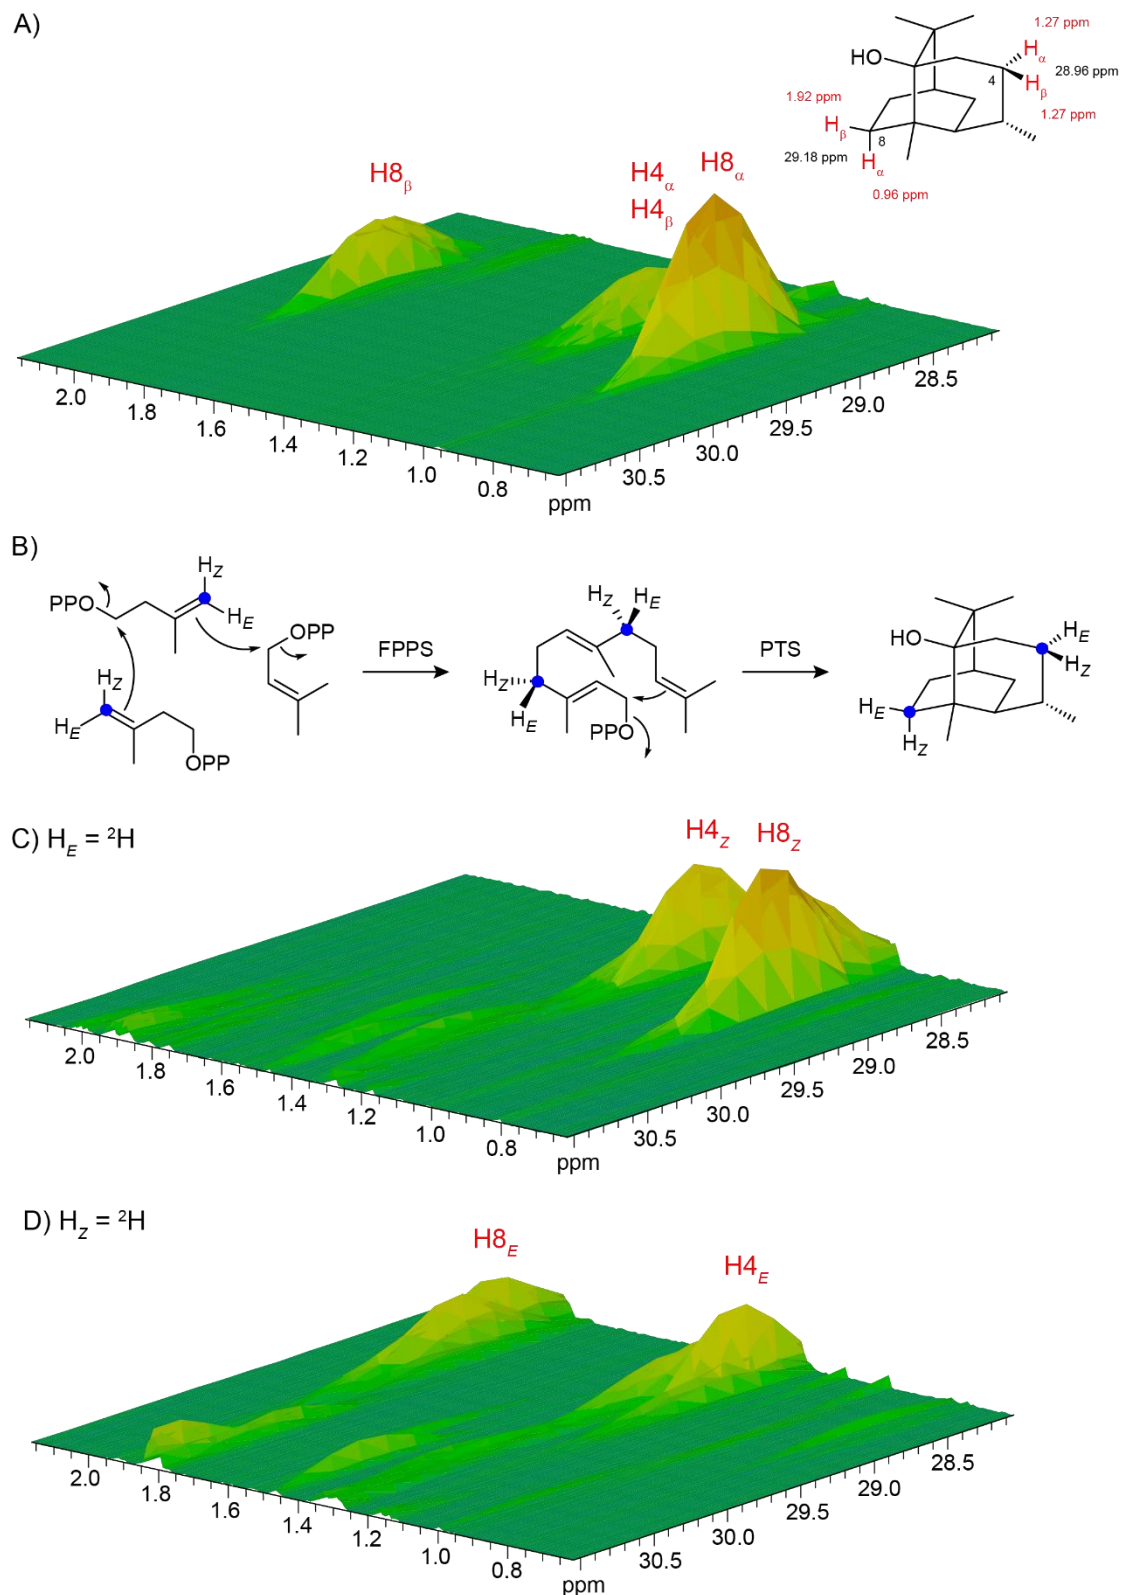

**Figure S11:** Determination of the absolute configuration of **3**. A) HSQC of unlabelled **3** showing crosspeaks for C4 and C8. HSQC of labelled **3** obtained from B) DMAPP and (*E*)-(4- $^{13}C$ ,4- $^2H$ )IPP, and C) DMAPP and (*Z*)-(4- $^{13}C$ ,4- $^2H$ )IPP with FPPS and PTS. The signals for deuterium incorporation are vanished, and because the configurations at deuterated carbons are known, the absolute configuration of **3** can be concluded.



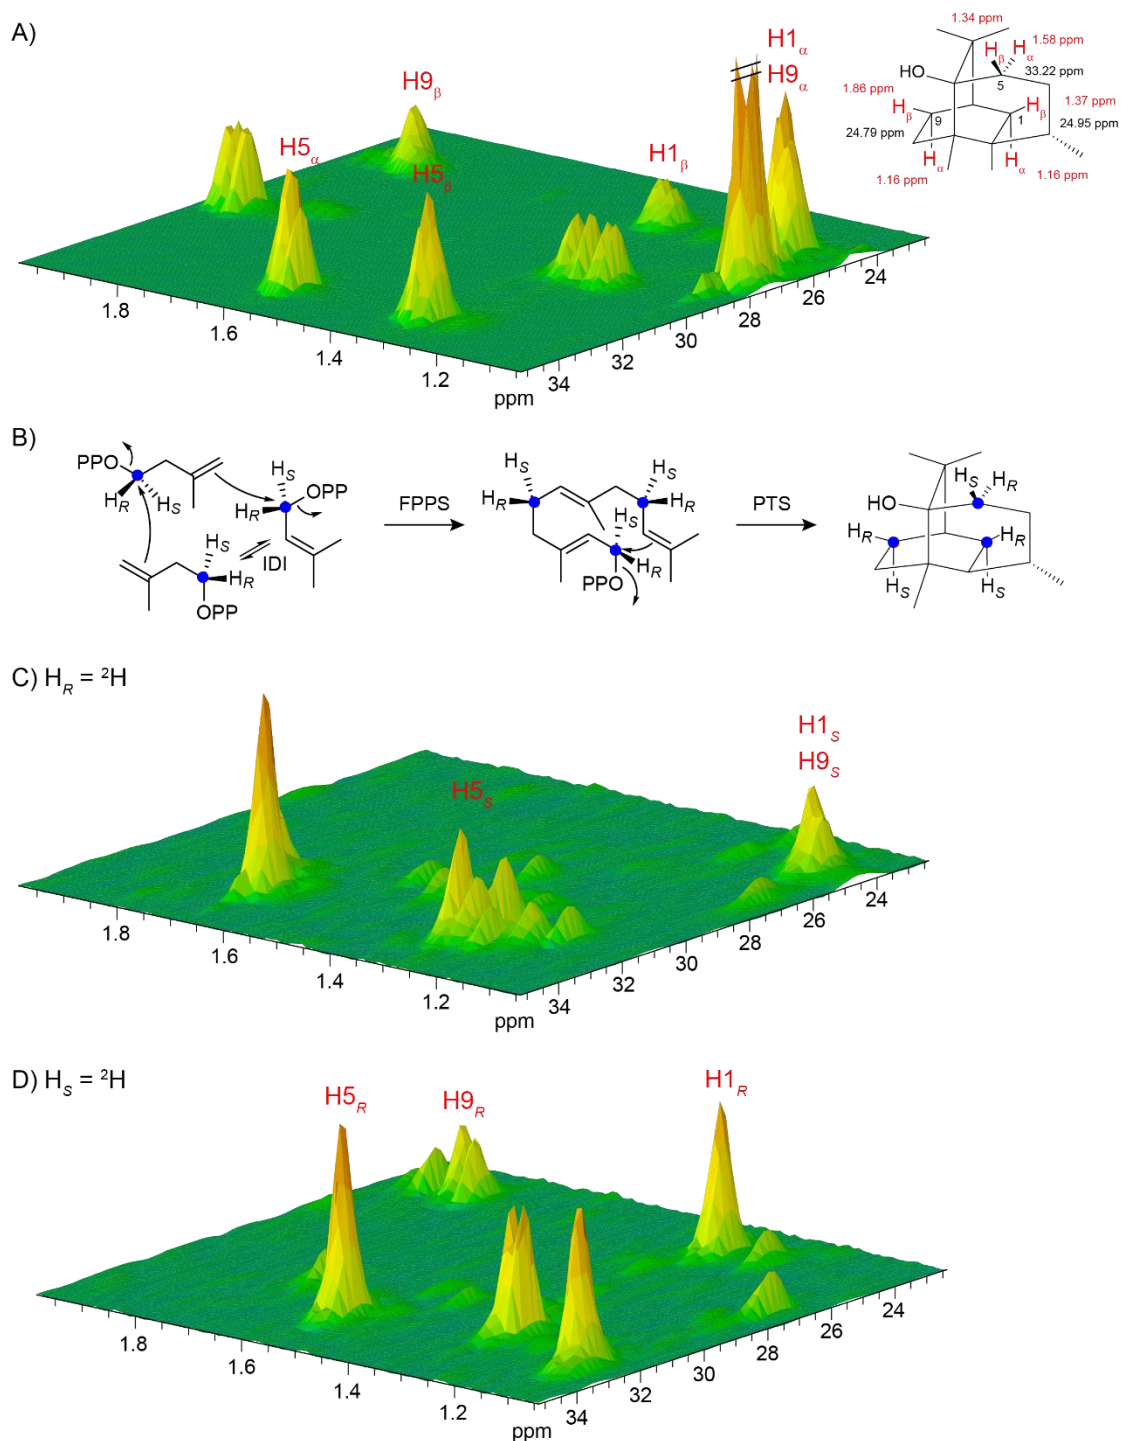

**Figure S12:** Determination of the absolute configuration of **3**. A) HSQC of unlabelled **3** showing crosspeaks for C1, C5 and C9. HSQC of labelled **3** obtained from B) (*R*)-(1- $^{13}C$ ,1- $^2H$ )IPP, and C) (*S*)-(1- $^{13}C$ ,1- $^2H$ )IPP with IDI, FPPS and PTS. The signals for deuterium incorporation are vanished, and because the configurations at deuterated carbons are known, the absolute configuration of **3** can be concluded.

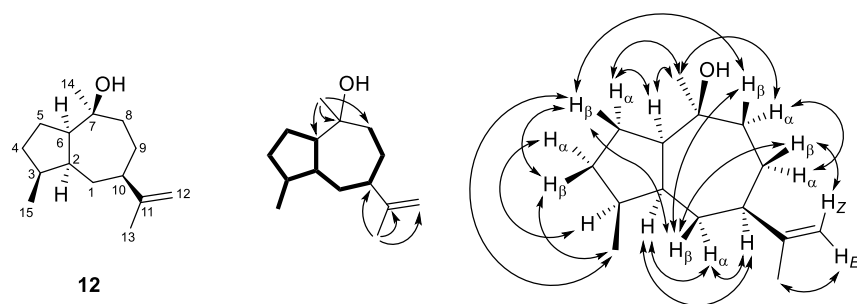

**Figure S13:** Structure elucidation of **12**. Bold:  $^1\text{H}, ^1\text{H}$ -COSY, single-headed arrows: key HMBC, and double-headed arrows: key NOESY correlations.

**Table S4:** NMR data of pogostol (**12**) in  $\text{C}_6\text{D}_6$  recorded at 298 K.

| $\text{C}^{[\text{a}]}$ | type                | $^{13}\text{C}^{[\text{b}]}$ | $^1\text{H}^{[\text{b}]}$                                                 |
|-------------------------|---------------------|------------------------------|---------------------------------------------------------------------------|
| 1                       | $\text{CH}_2$       | 28.64                        | 1.45 (dm, $J = 13.8$ , $\text{H}_\alpha$ )<br>1.16 (m, $\text{H}_\beta$ ) |
| 2                       | CH                  | 46.24                        | 1.91 (m)                                                                  |
| 3                       | CH                  | 39.20                        | 1.87 (m)                                                                  |
| 4                       | $\text{CH}_2$       | 31.35                        | 1.59 (m, $\text{H}_\alpha$ )<br>1.17 (m, $\text{H}_\beta$ )               |
| 5                       | $\text{CH}_2$       | 26.39                        | 1.55 (m, $\text{H}_\alpha$ )<br>1.37 (m, $\text{H}_\beta$ )               |
| 6                       | CH                  | 55.90                        | 1.90 (m)                                                                  |
| 7                       | $\text{C}_\text{q}$ | 74.05                        | —                                                                         |
| 8                       | $\text{CH}_2$       | 35.53                        | 1.73 (m, $\text{H}_\beta$ )<br>1.36 (m, $\text{H}_\alpha$ )               |
| 9                       | $\text{CH}_2$       | 28.92                        | 1.93 (m, $\text{H}_\alpha$ )<br>1.39 (m, $\text{H}_\beta$ )               |
| 10                      | CH                  | 46.16                        | 2.42 (m)                                                                  |
| 11                      | $\text{C}_\text{q}$ | 152.51                       | —                                                                         |
| 12                      | $\text{CH}_2$       | 108.28                       | 4.83 (m, $\text{H}_\text{Z}$ )<br>4.72 (m, $\text{H}_\text{E}$ )          |
| 13                      | $\text{CH}_3$       | 20.07                        | 1.68 (dd, $J = 1.4, 0.8$ )                                                |
| 14                      | $\text{CH}_3$       | 30.57                        | 1.02 (s)                                                                  |
| 15                      | $\text{CH}_3$       | 16.36                        | 0.85 (d, $J = 6.9$ )                                                      |
|                         | OH                  | —                            | 0.80 (br s)                                                               |

[a] Carbon numbering as shown in Figure S13. [b] Chemical shifts  $\delta$  in ppm; multiplicity: s = singlet, d = doublet, m = multiplet, br = broad; coupling constants  $J$  are given in Hertz.

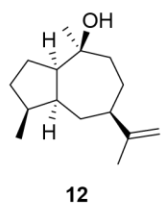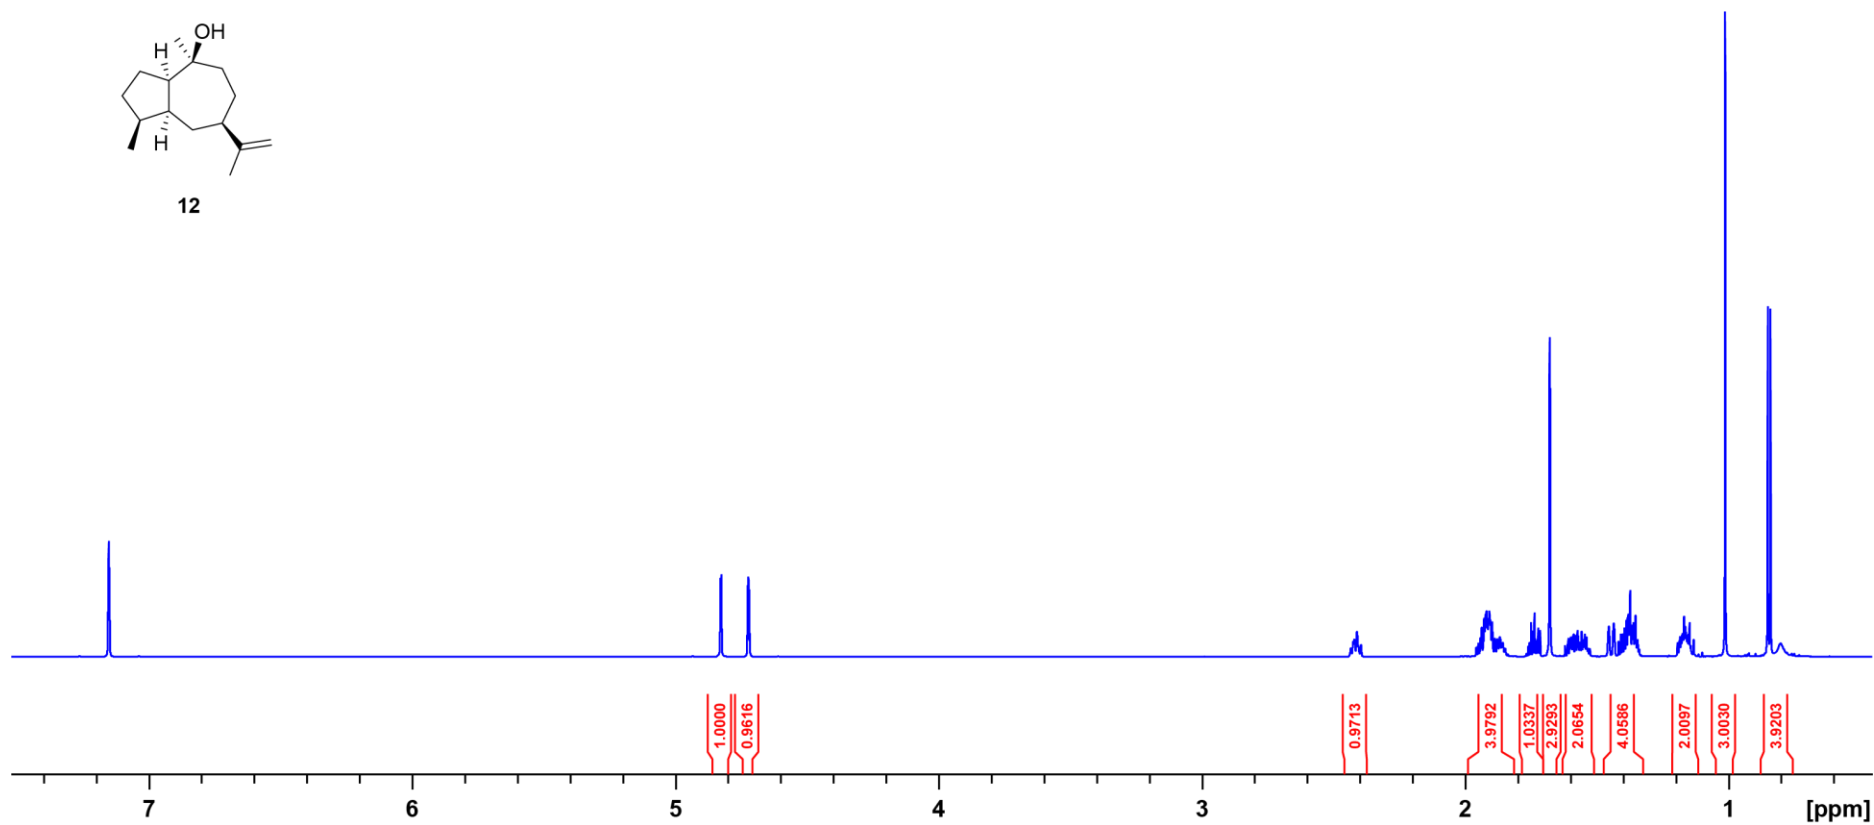

**Figure S14:** <sup>1</sup>H NMR spectrum of **12** (700 MHz, C<sub>6</sub>D<sub>6</sub>).

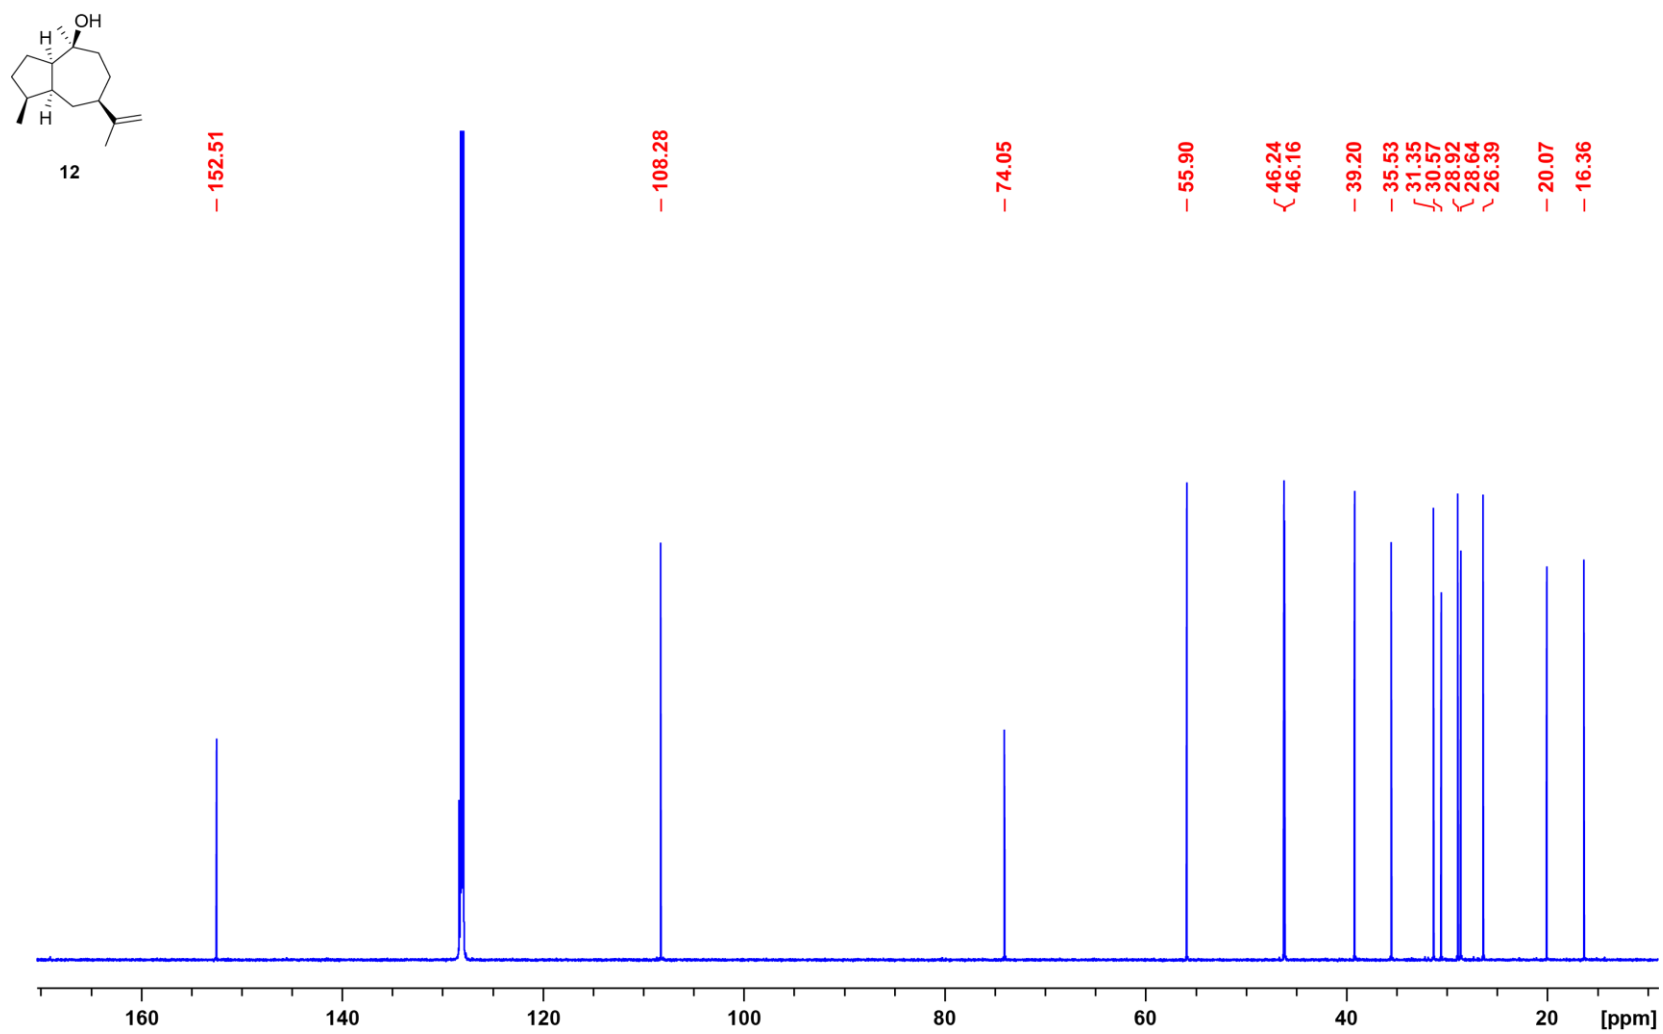

**Figure S15:**  $^{13}\text{C}$  NMR spectrum of **12** (176 MHz,  $\text{C}_6\text{D}_6$ ).

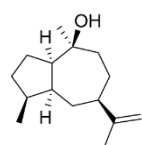

**12**

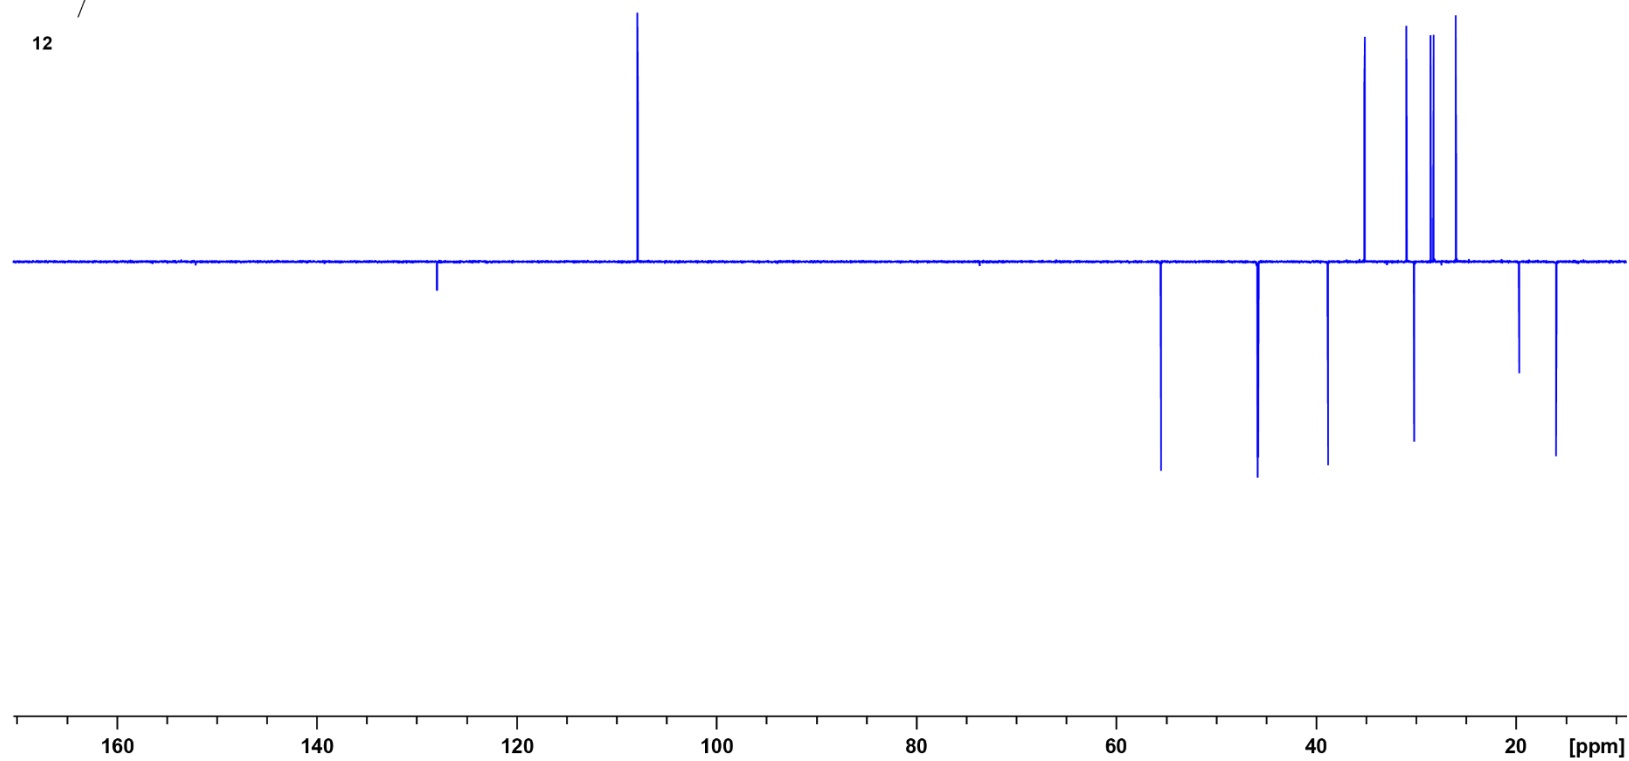

**Figure S16:**  $^{13}\text{C}$ -DEPT spectrum of **12** (176 MHz,  $\text{C}_6\text{D}_6$ ).

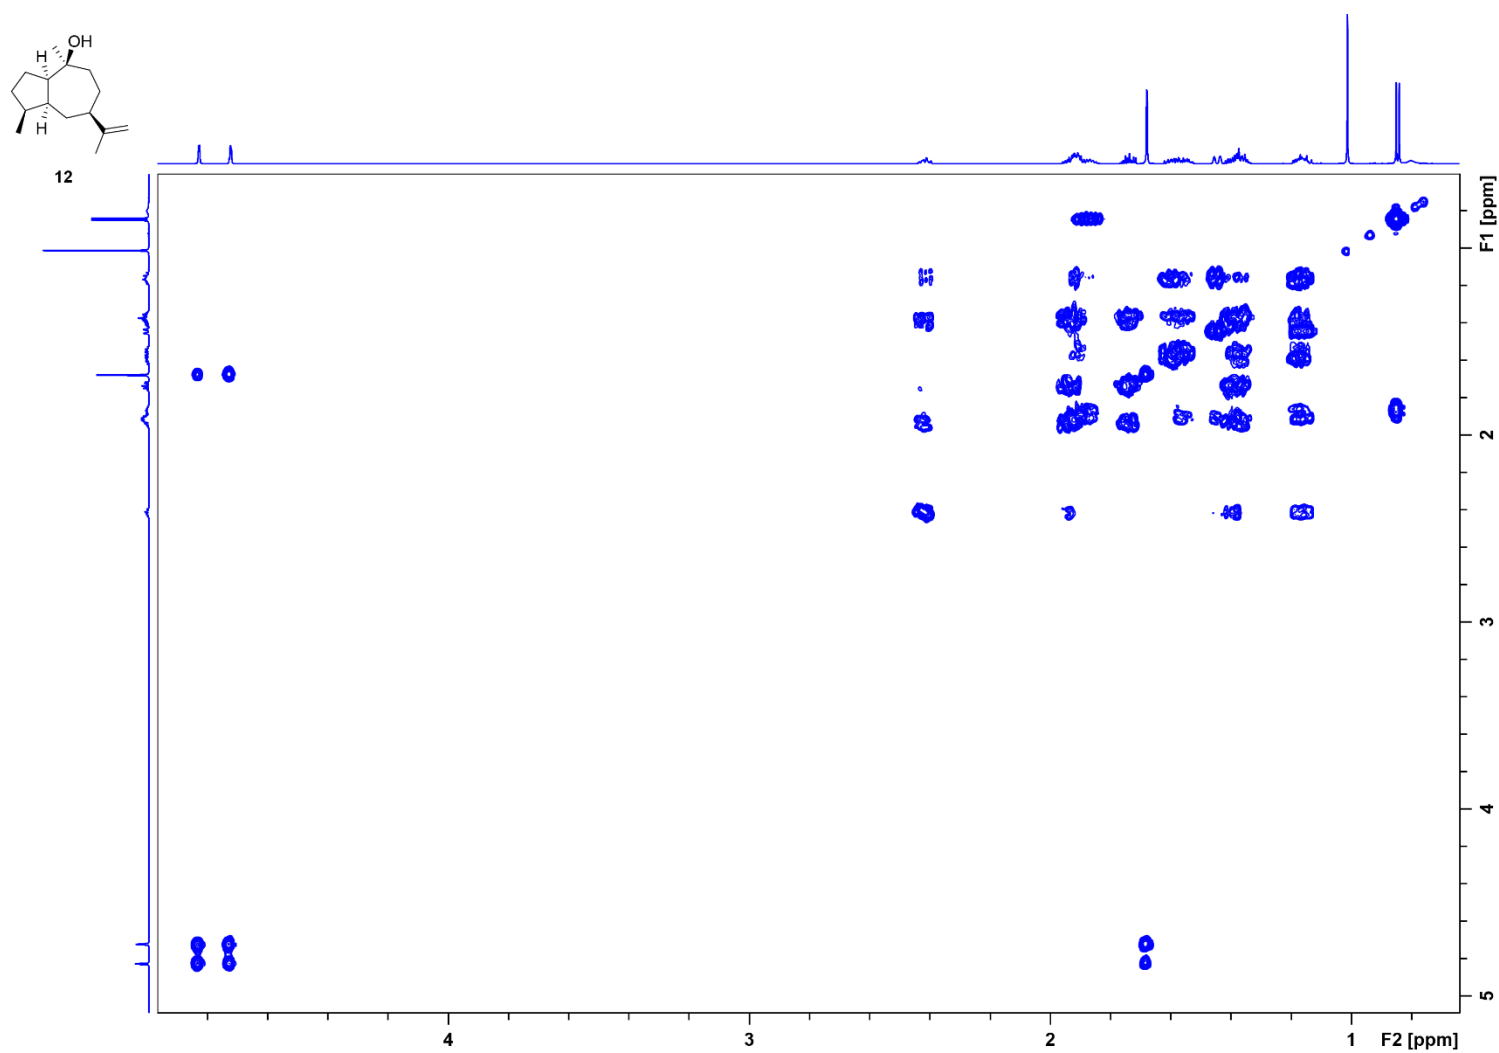

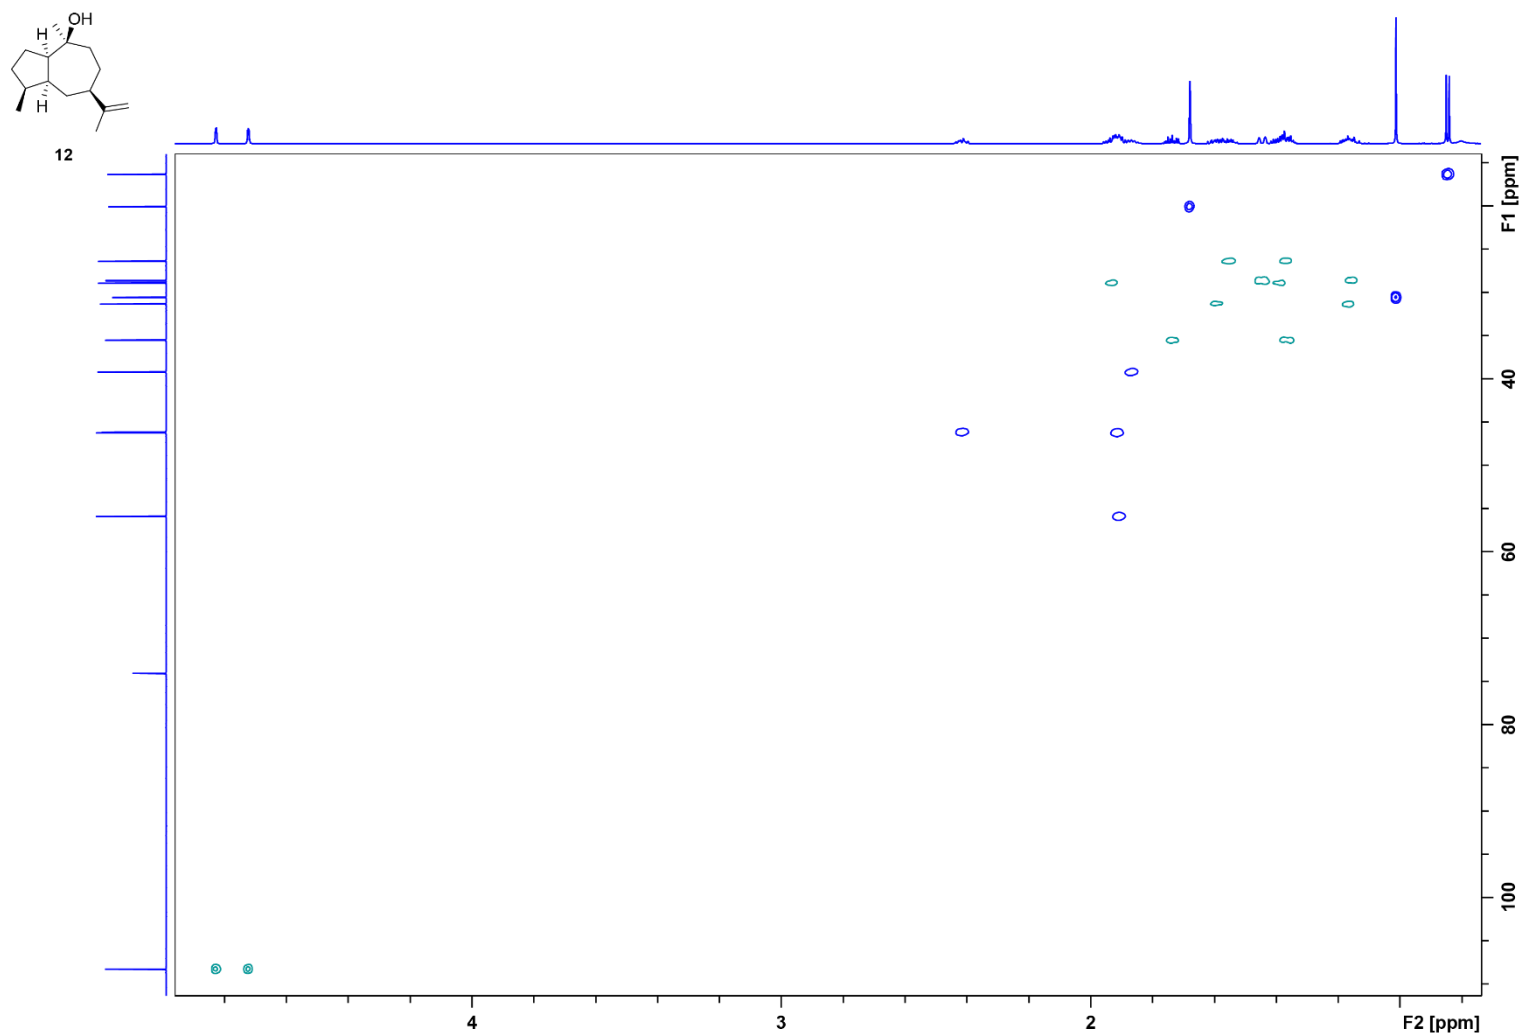

**Figure S18:** HSQC spectrum of **12** ( $\text{C}_6\text{D}_6$ ).

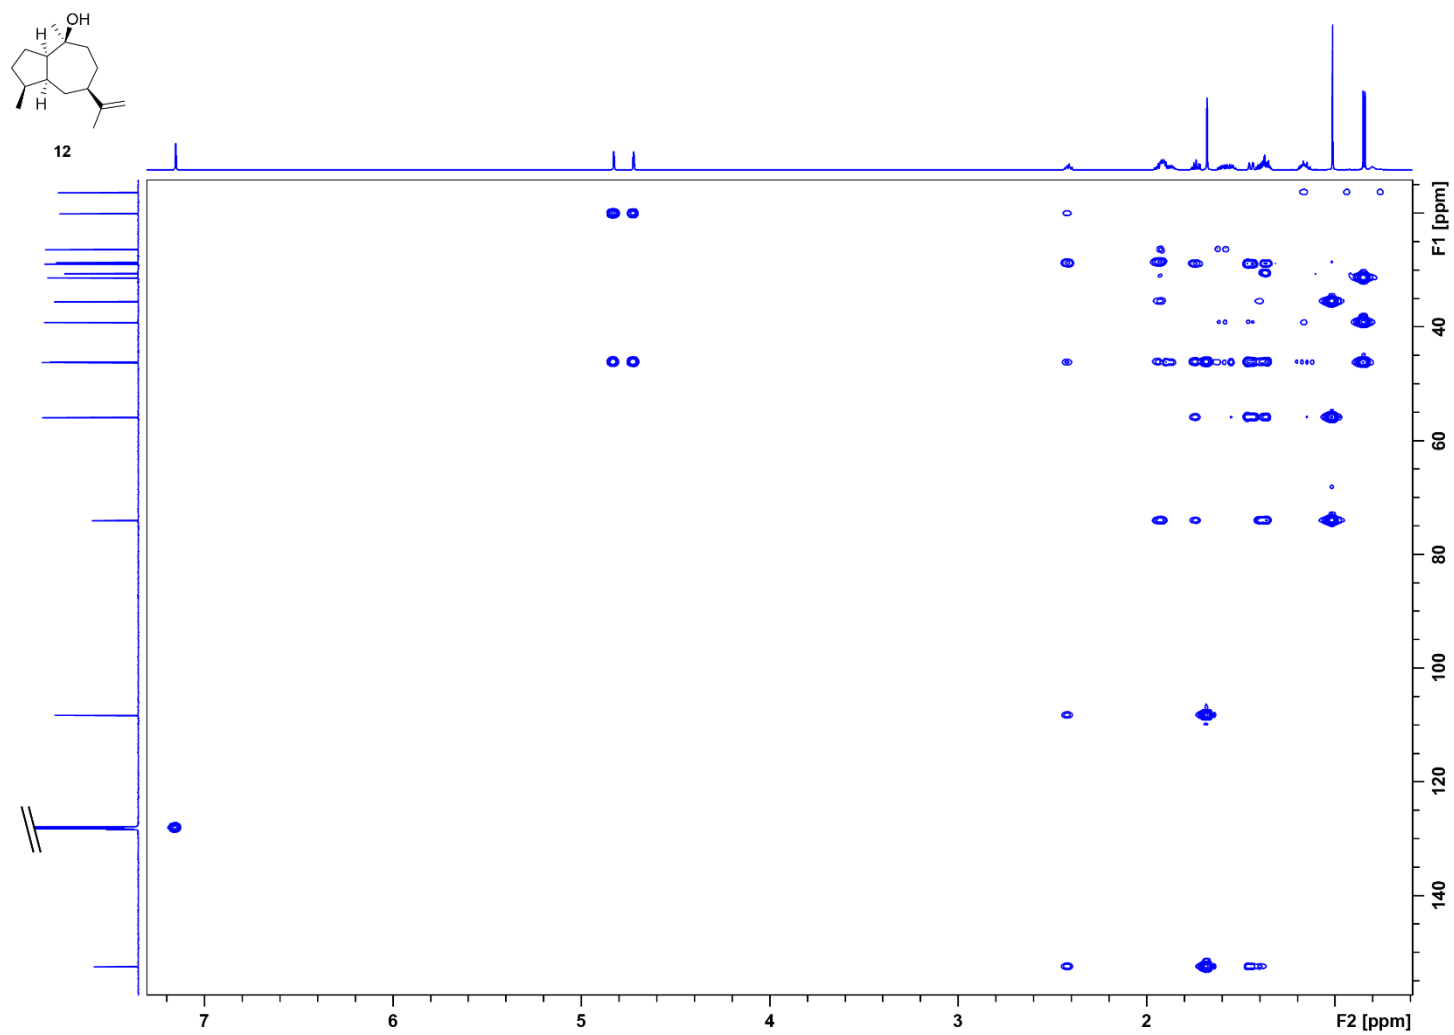

**Figure S19:** HMBC spectrum of **12** ( $C_6D_6$ ).



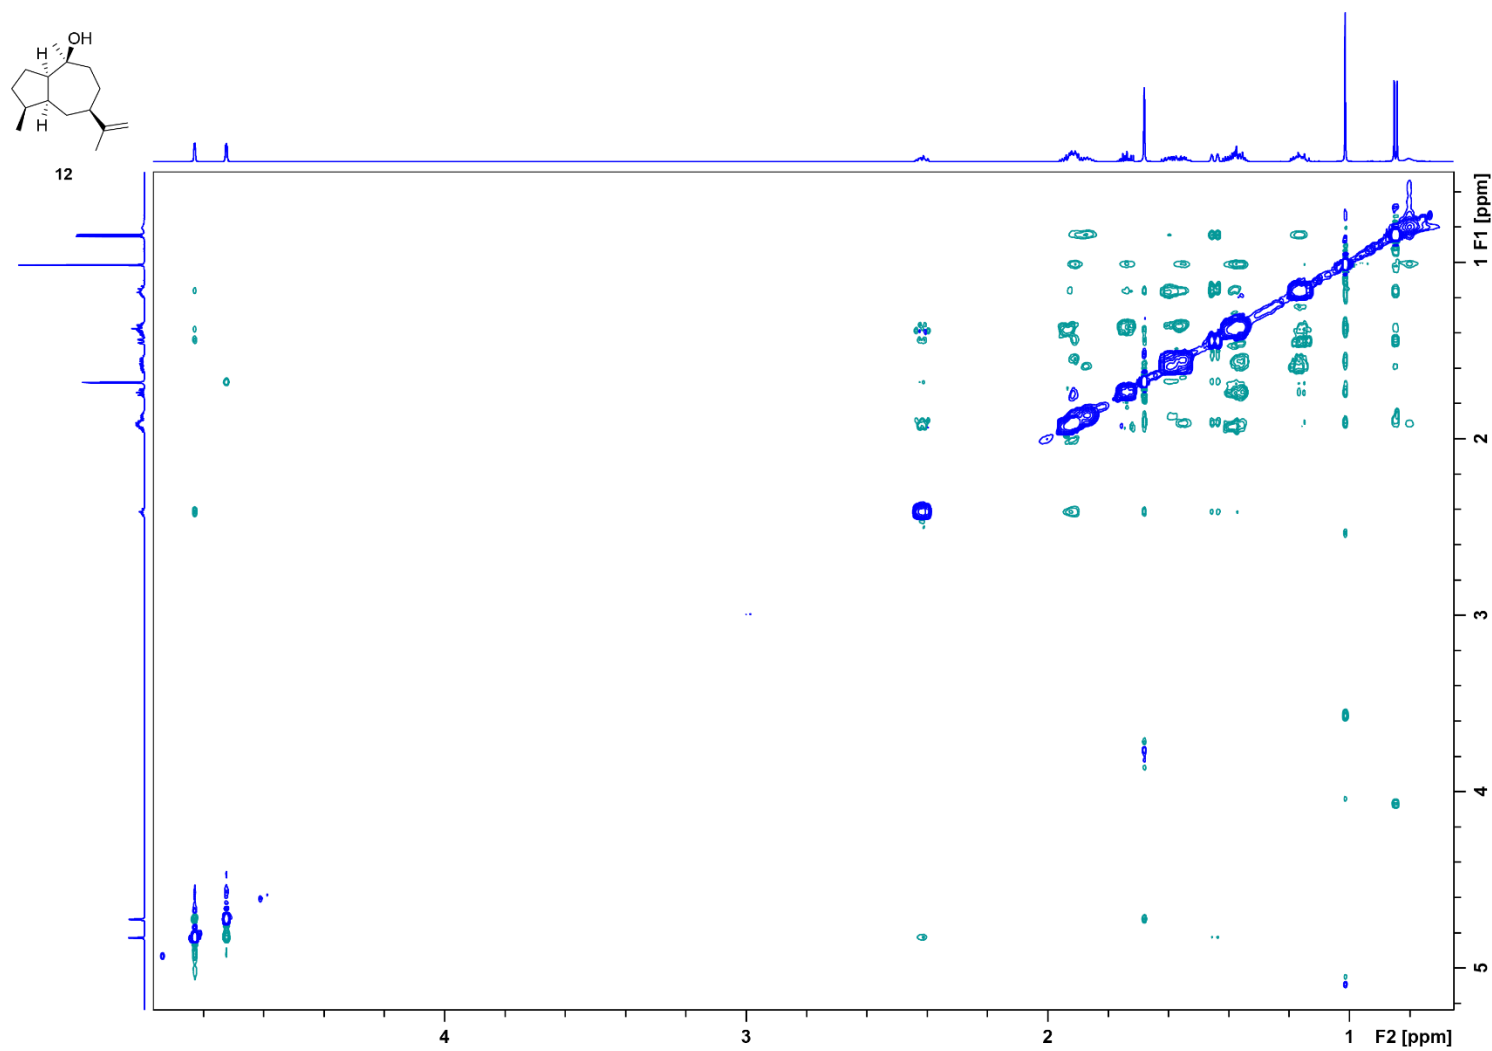

**Figure S20:** NOESY spectrum of **12** (C<sub>6</sub>D<sub>6</sub>).

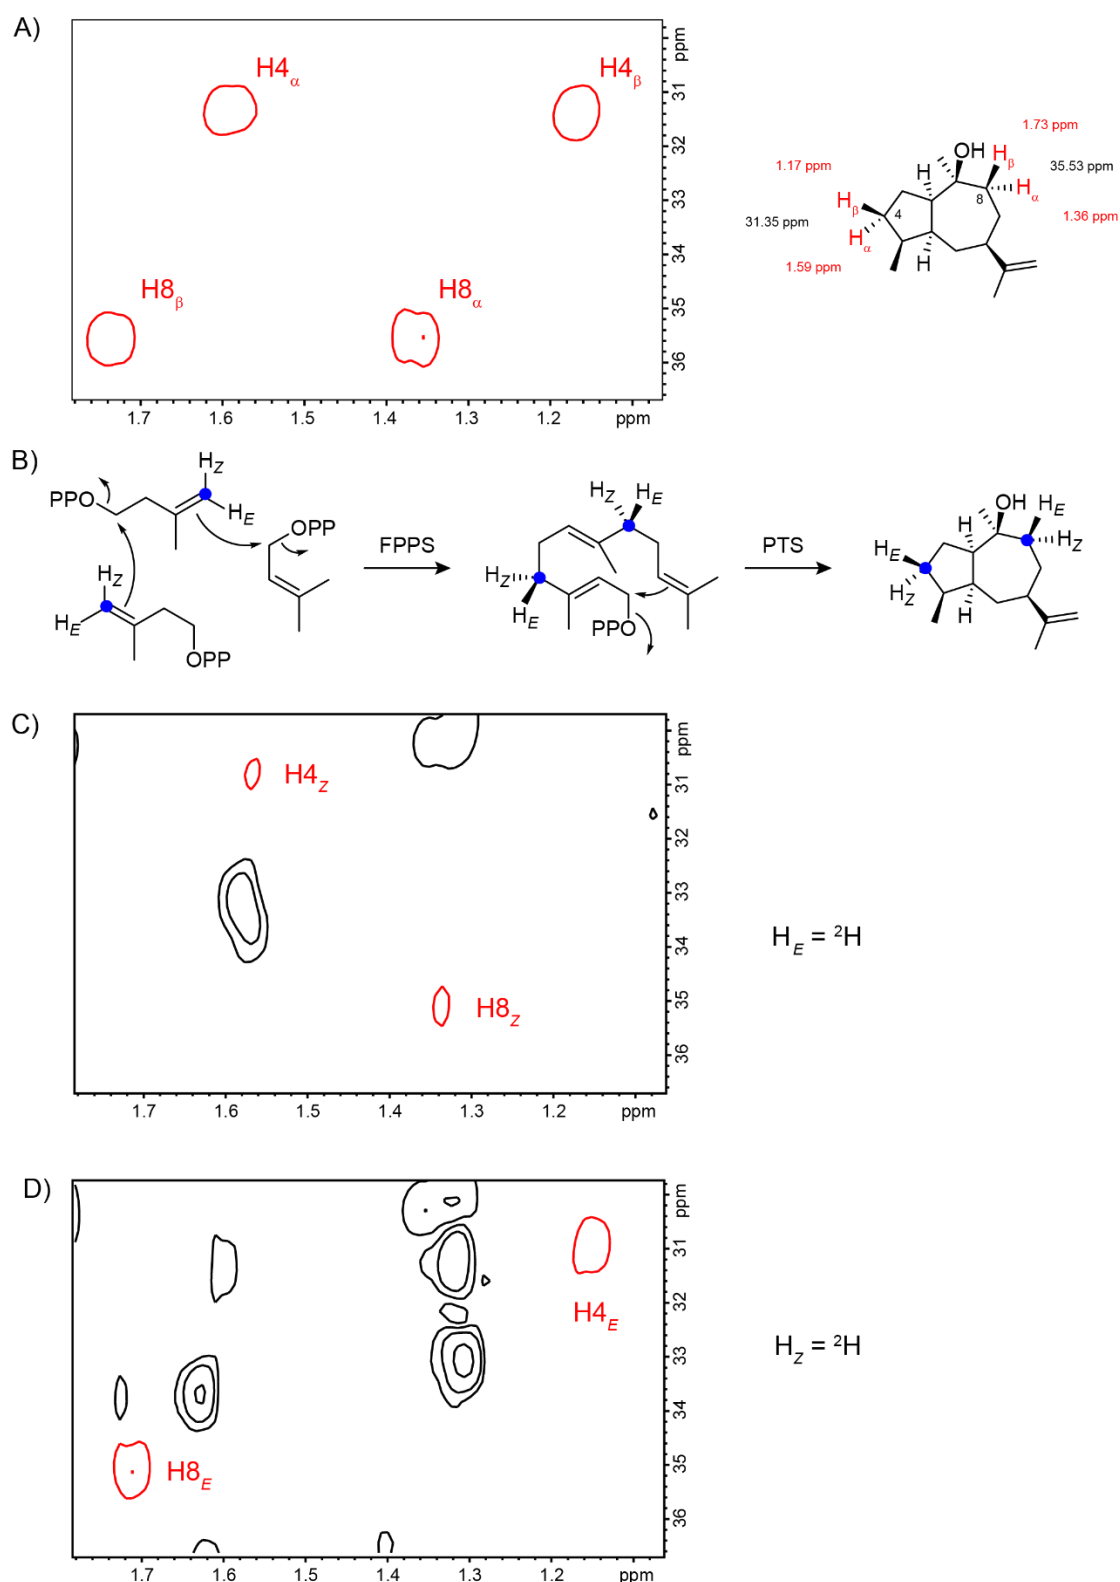

**Figure S21:** Determination of the absolute configuration of **3**. A) HSQC of unlabelled **12** showing crosspeaks for C4 and C8. HSQC of labelled **12** obtained from B) DMAPP and (*E*)-(4-<sup>13</sup>C,4-<sup>2</sup>H)IPP, and C) DMAPP and (*Z*)-(4-<sup>13</sup>C,4-<sup>2</sup>H)IPP with FPPS and PTS. The signals for deuterium incorporation are vanished, and because the configurations at deuterated carbons are known, the absolute configuration of **12** can be concluded.

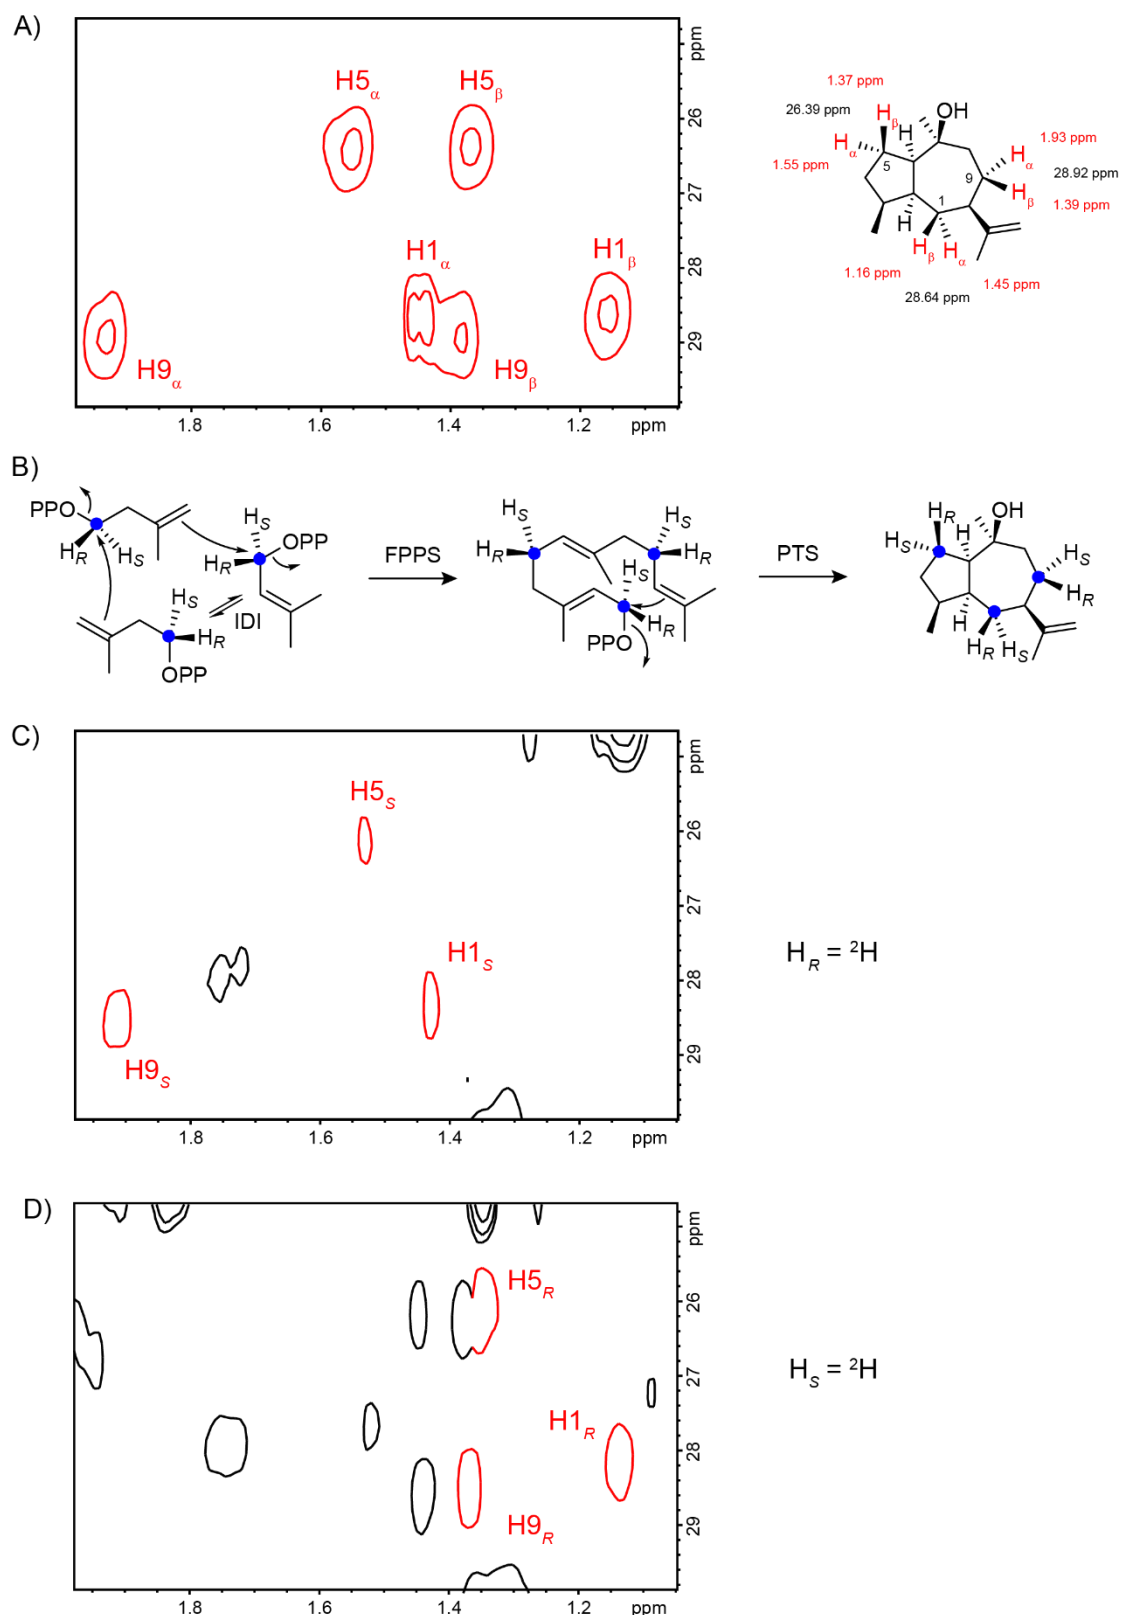

**Figure S22:** Determination of the absolute configuration of **12**. A) HSQC of unlabelled **12** showing crosspeaks for C1, C5, and C9. HSQC of labelled **12** obtained from B) (*R*)-(1-<sup>13</sup>C,1-<sup>2</sup>H)IPP, and C) (*S*)-(1-<sup>13</sup>C,1-<sup>2</sup>H)IPP with IDI, FPPS and PTS. The signals for deuterium incorporation are vanished, and because the configurations at deuterated carbons are known, the absolute configuration of **12** can be concluded.

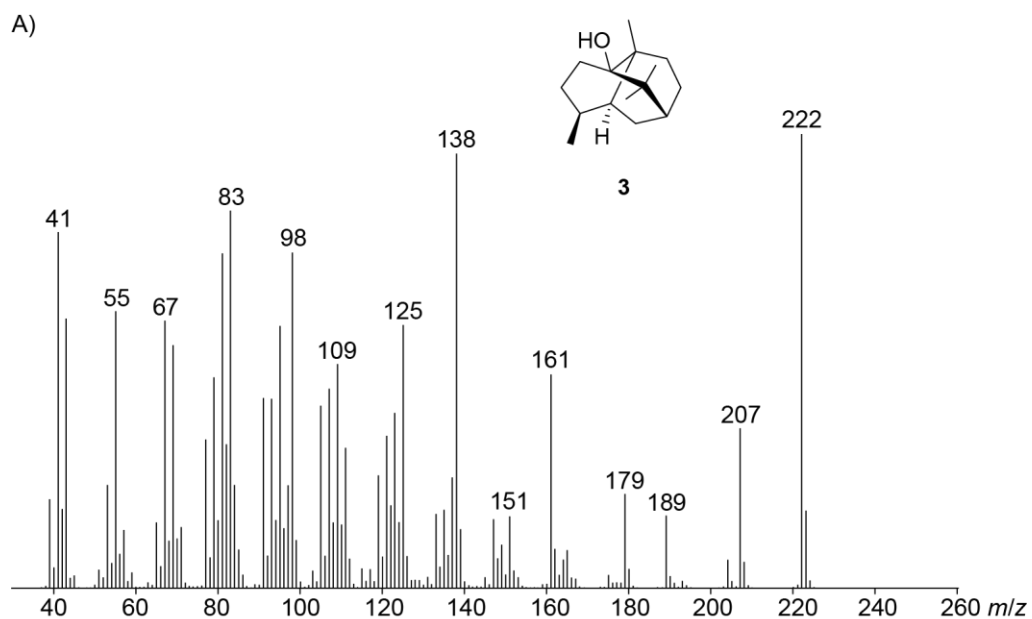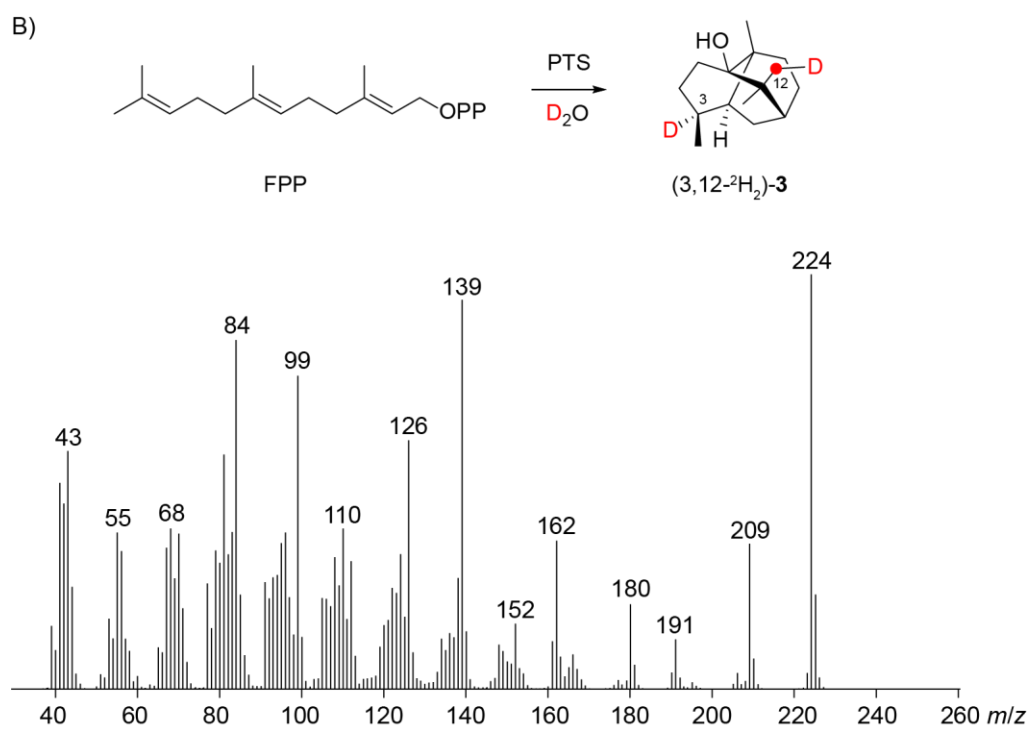

**Figure S23:** Incubation of FPP with PTS in deuterium oxide buffer. Mass spectra (EI), A) of unlabelled patchoulol (**3**) and B) of labelled **3** from the incubation in D<sub>2</sub>O showing incorporation of two deuterium atoms.

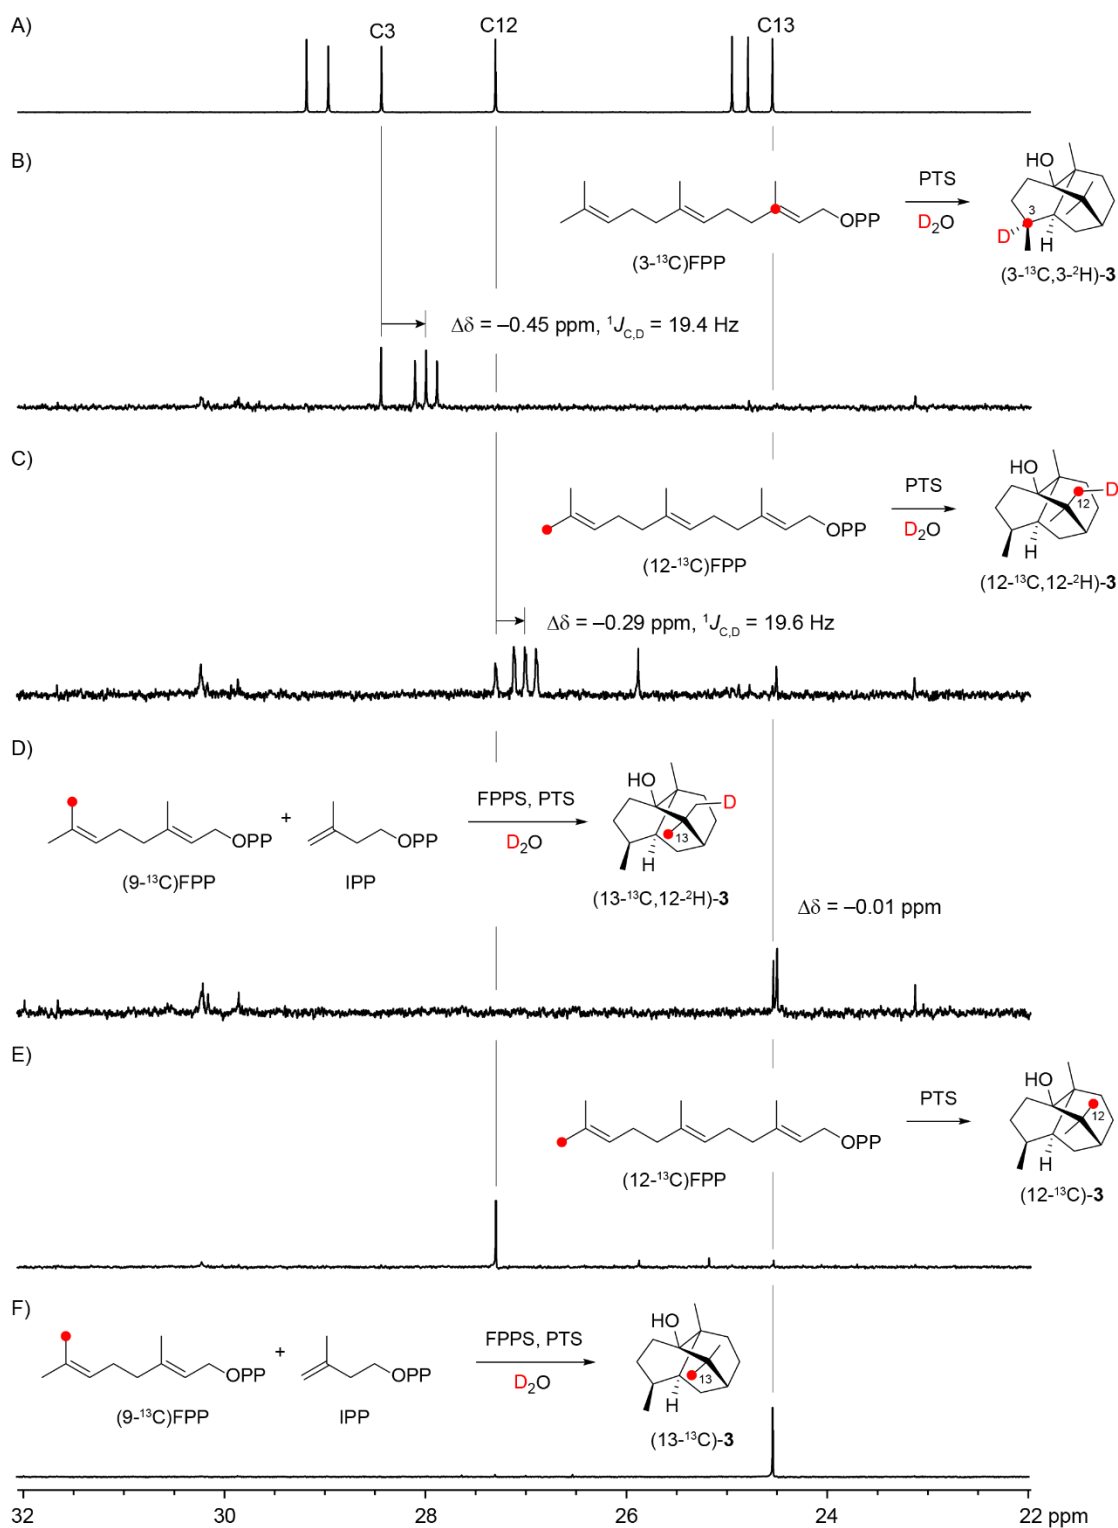

**Figure S24:** Determination of the sites of deuterium incorporation from the medium into **3** and stereochemical course of the geminal Me groups of FPP. Partial  $^{13}\text{C}$  NMR spectra of A) unlabelled **3**, B)  $(3\text{-}^{13}\text{C}, 3\text{-}^2\text{H})\text{-3}$  obtained from  $(3\text{-}^{13}\text{C})\text{FPP}$  with PTS in  $\text{D}_2\text{O}$  buffer, C)  $(12\text{-}^{13}\text{C}, 12\text{-}^2\text{H})\text{-3}$  obtained from  $(12\text{-}^{13}\text{C})\text{FPP}$  with PTS in  $\text{D}_2\text{O}$  buffer, D)  $(13\text{-}^{13}\text{C}, 12\text{-}^2\text{H})\text{-3}$  obtained from  $(9\text{-}^{13}\text{C})\text{GPP}$  and IPP with FPPS and PTS in  $\text{D}_2\text{O}$  buffer, E)  $(12\text{-}^{13}\text{C})\text{-3}$  obtained from  $(12\text{-}^{13}\text{C})\text{FPP}$  with PTS, and F)  $(13\text{-}^{13}\text{C})\text{-3}$  obtained from  $(9\text{-}^{13}\text{C})\text{GPP}$  and IPP with FPPS and PTS.

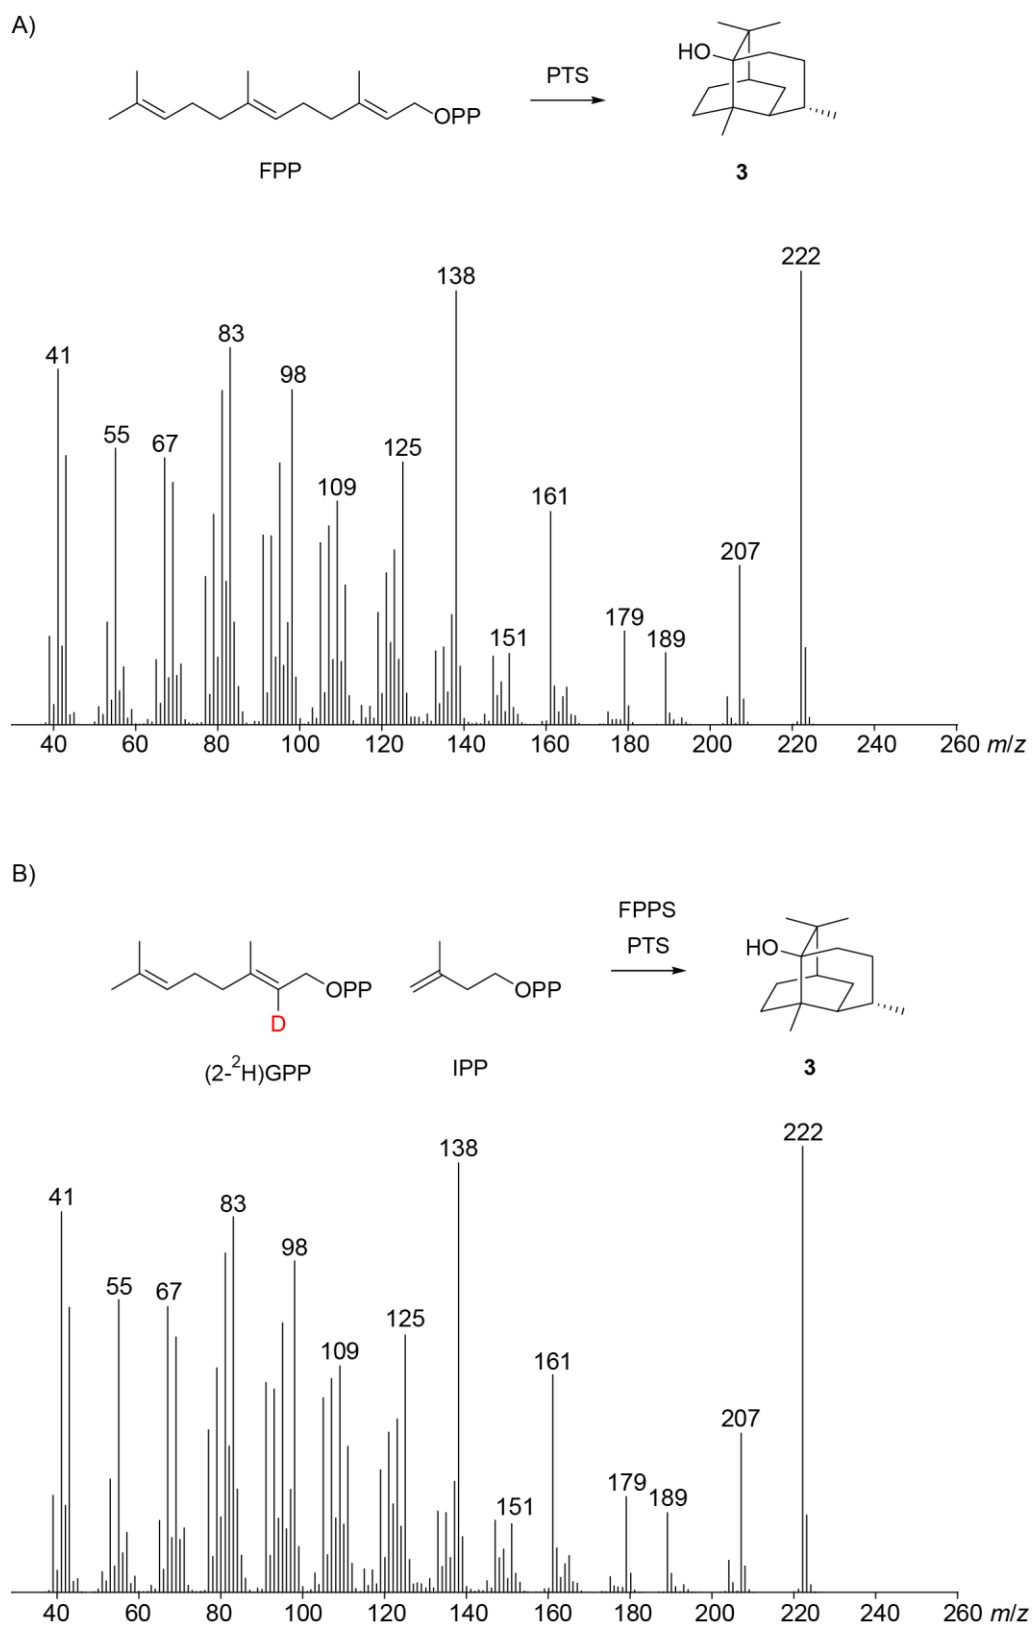

**Figure S25:** EI mass spectra of A) **3** obtained from FPP and B) **3** obtained from an incubation of (2-<sup>2</sup>H)GPP and IPP with FPPS and PTS, showing complete loss of deuterium.

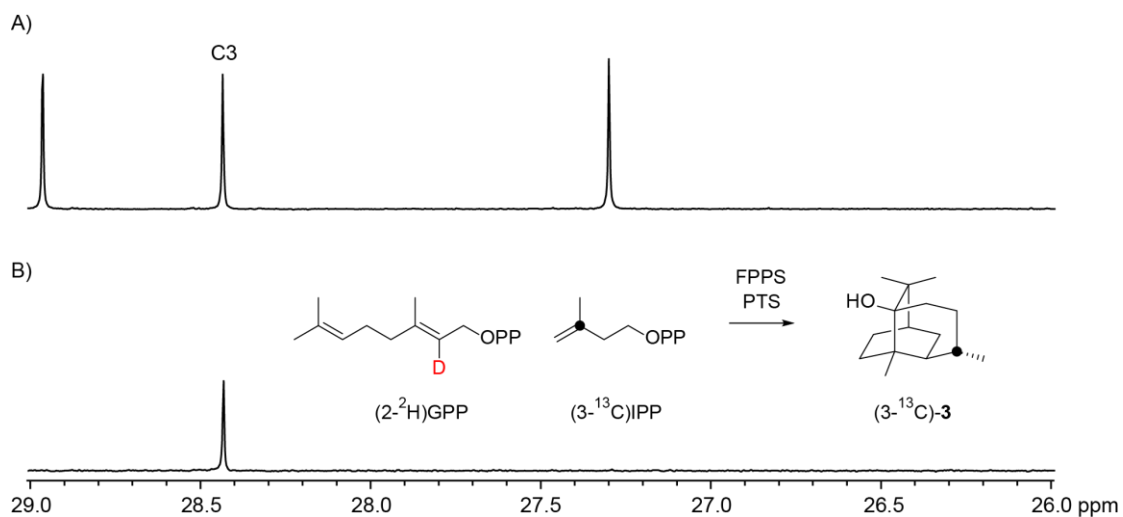

**Figure S26:** Partial  $^{13}\text{C}$  NMR spectra of A) unlabelled **3** and B) labelled  $(3\text{-}^{13}\text{C})\text{-3}$  obtained from an incubation of  $(2\text{-}^2\text{H})\text{GPP}$  and  $(3\text{-}^{13}\text{C})\text{IPP}$  with FPPS and PTS. The absence of a triplet peak in B) indicates that the 1,4-hydride shift from **C** to **D** (Scheme 1 of main text) or the 1,3-hydride shift from **H** to **J** (Scheme 3 of main text) does not occur.

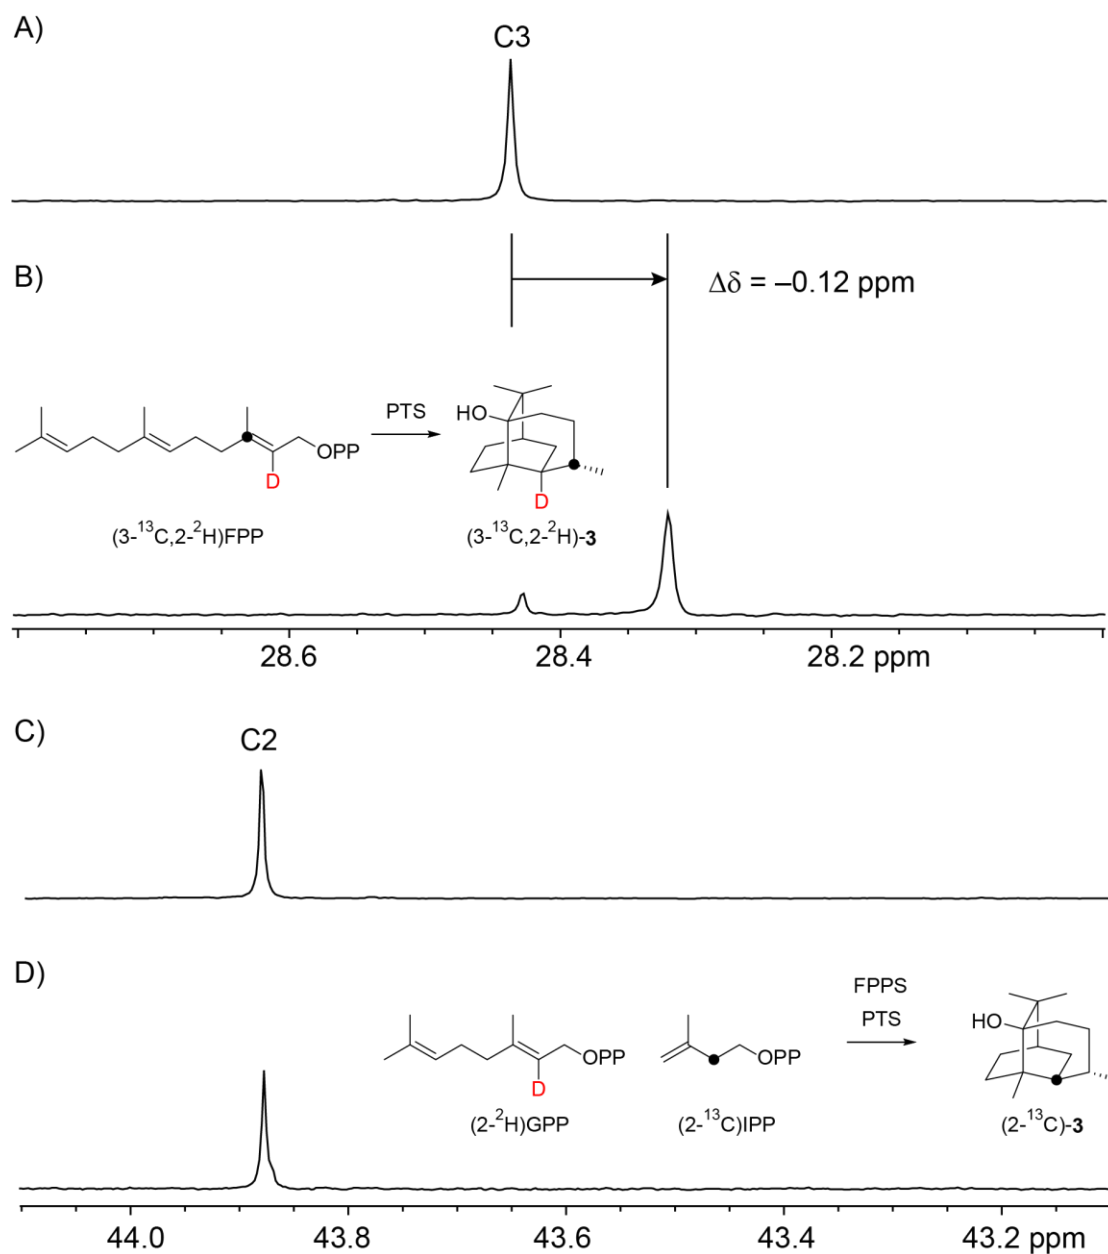

**Figure S27:** Partial  $^{13}\text{C}$  NMR spectra A) of unlabelled **3** showing the region for C3, and B) of labelled **3** obtained from  $(3\text{-}^{13}\text{C}, 2\text{-}^2\text{H})\text{FPP}$  with PTS. The small upfield shift indicates deuterium bound to a neighbouring carbon of C3. Partial  $^{13}\text{C}$  NMR spectra C) of unlabelled **3** showing the region for C2, and D) of labelled **3** obtained from  $(2\text{-}^2\text{H})\text{GPP}$  and  $(2\text{-}^{13}\text{C})\text{IPP}$  with FPPS and PTS. The absence of triplet signals for the labelled carbons in B) and D) excludes a series of 1,2-hydride shifts as shown in Scheme 3 of main text (from **H** via **I** to **J**).



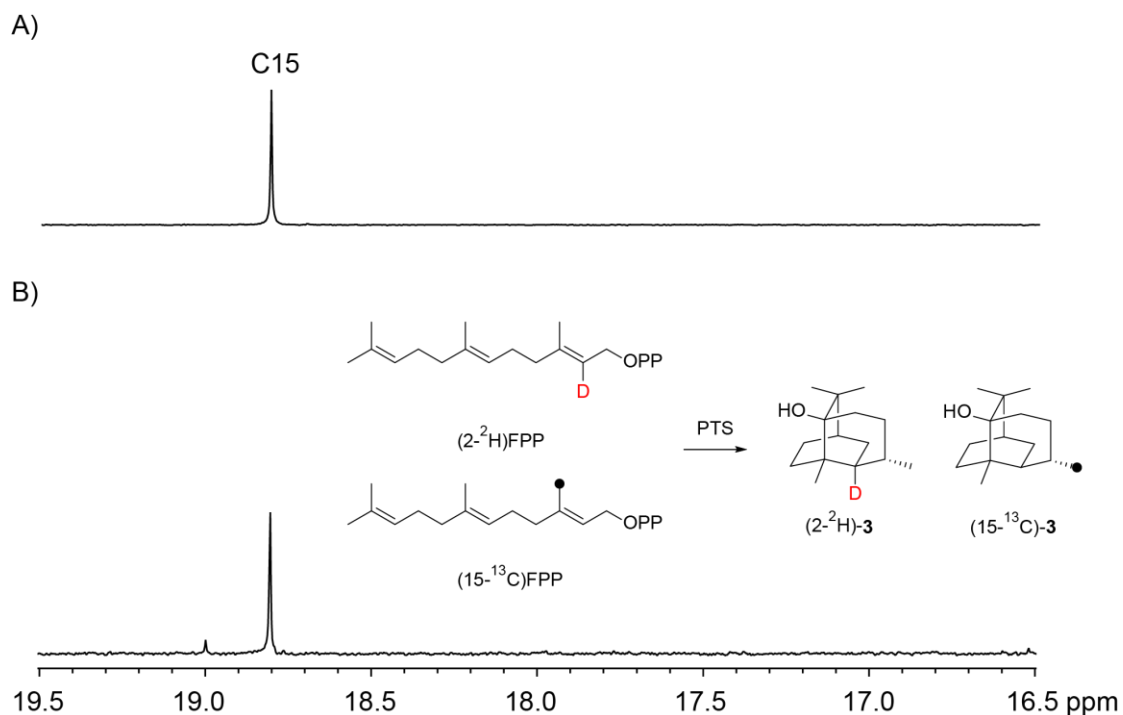

**Figure S28:** Partial <sup>13</sup>C NMR spectra A) of unlabelled **3** showing the region for C15, and B) of labelled **3** obtained from the mixed substrates (2-<sup>2</sup>H)FPP and (15-<sup>13</sup>C)FPP with PTS. The absence of a triplet for C15 in B) excludes the intermolecular deuterium transfer from (2-<sup>2</sup>H)FPP to (15-<sup>13</sup>C)FPP.

### DFT calculations

All computed structures are geometry optimised without restrictions and are characterised as minima or as transition state structures by frequency analyses, also providing Gibbs-corrections, using the B97D3/6-31g(d,p) method with the density fitting approximation for s- and p-functions, including Grimme's empirical D3-dispersion correction [12] in Gaussian16 [13].

For improved single point energies, the mPW1PW91 functional is applied with the 6-311+G(d,p) basis set without density fitting and the ultra-fine integration grid, as this method has shown to be very reliable for examining carbocation cyclisation rearrangement reactions [14-17].

The Gibbs-corrections include an entropic quasi-harmonic treatment with a frequency cut-off value of 100.0 wavenumbers, according to Grimme, using a mixture of RRHO and free-rotor vibrational entropies [18,19].

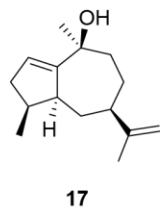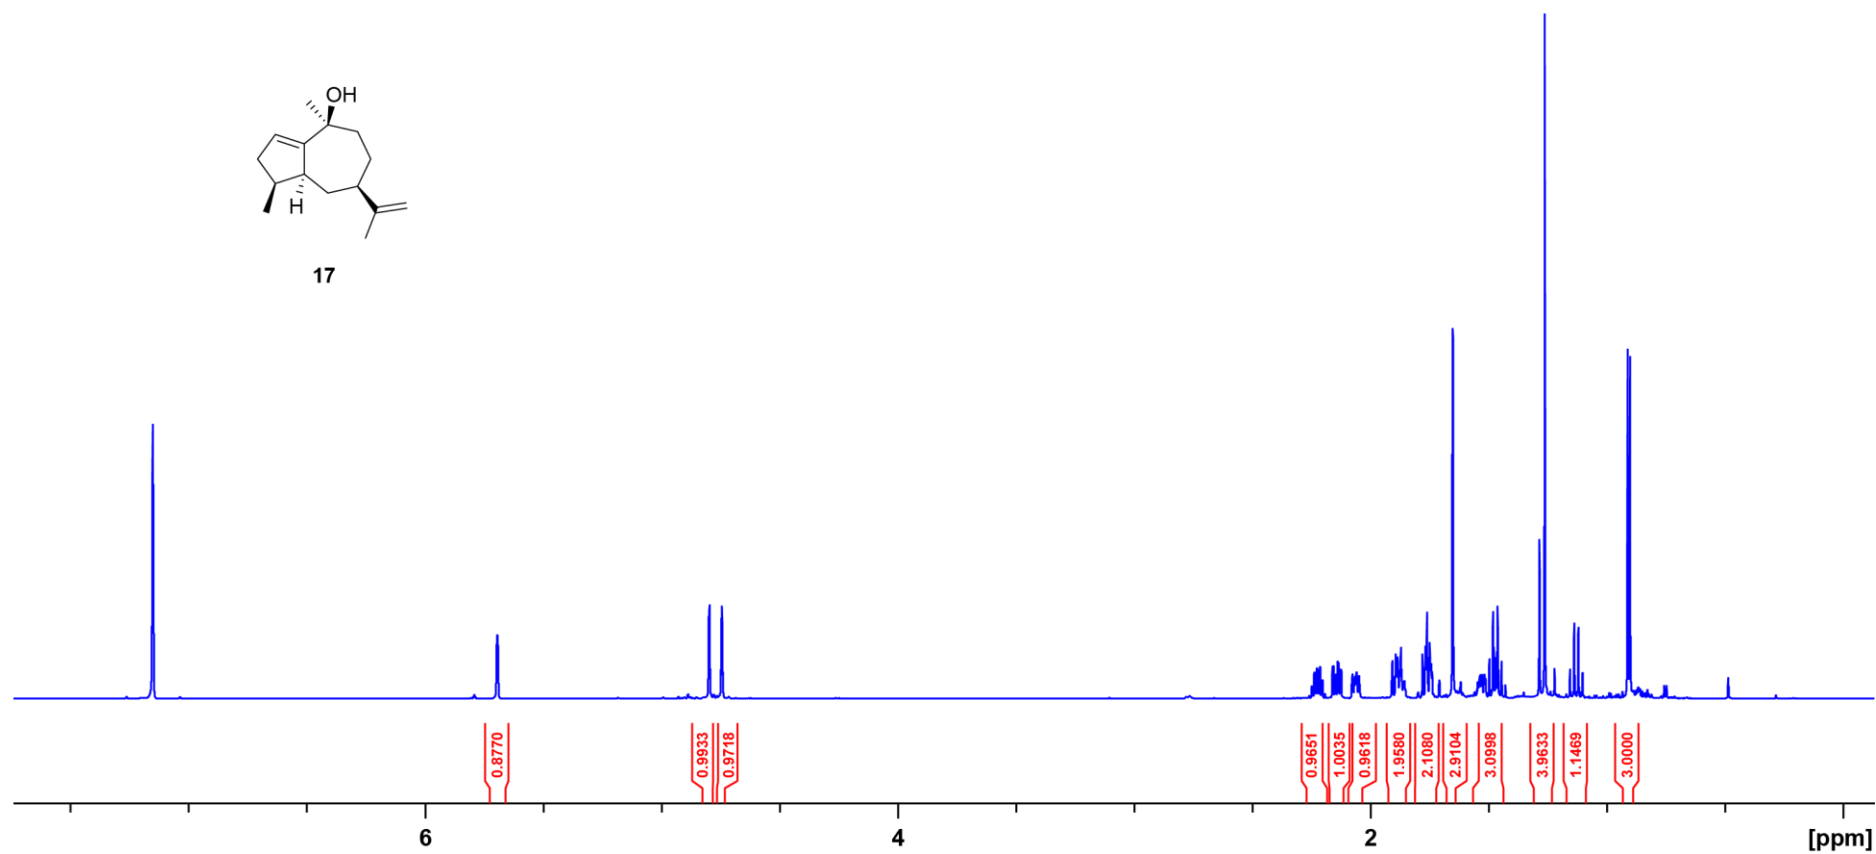

Figure S29:  $^1\text{H}$  NMR spectrum of **17** (700 MHz,  $\text{C}_6\text{D}_6$ ).

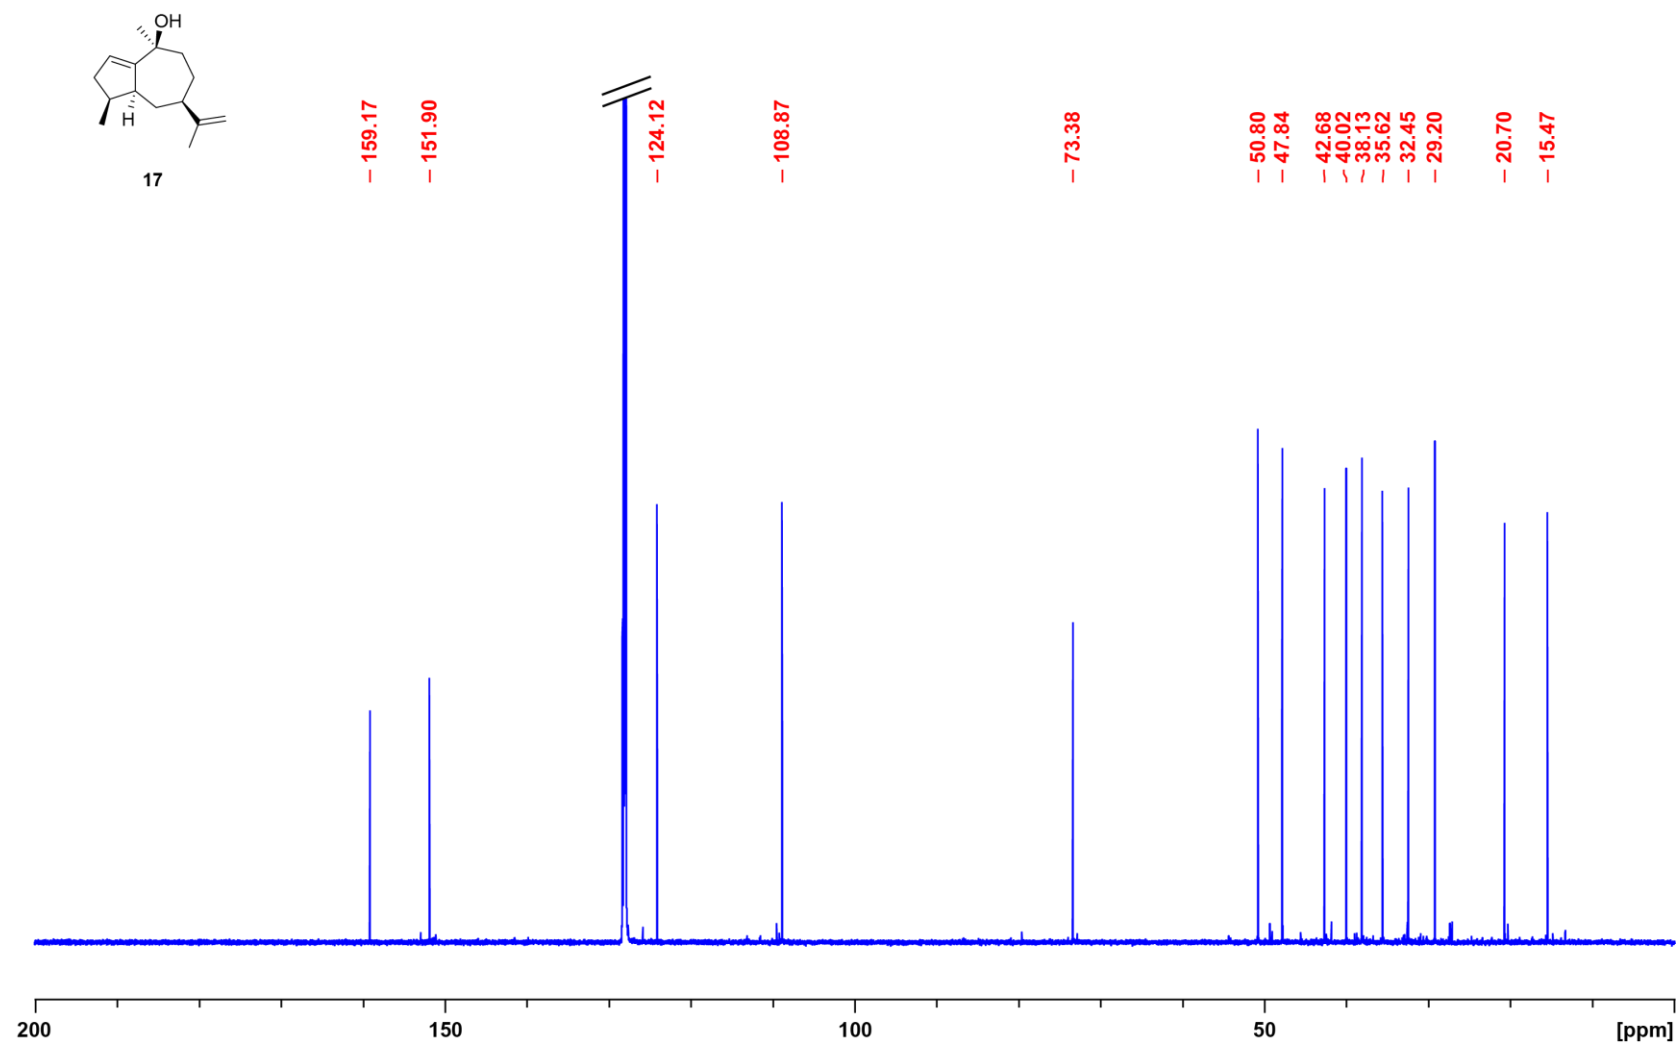

**Figure S30:**  $^{13}\text{C}$  NMR spectrum of **17** (176 MHz,  $\text{C}_6\text{D}_6$ ).

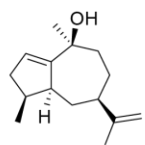

17

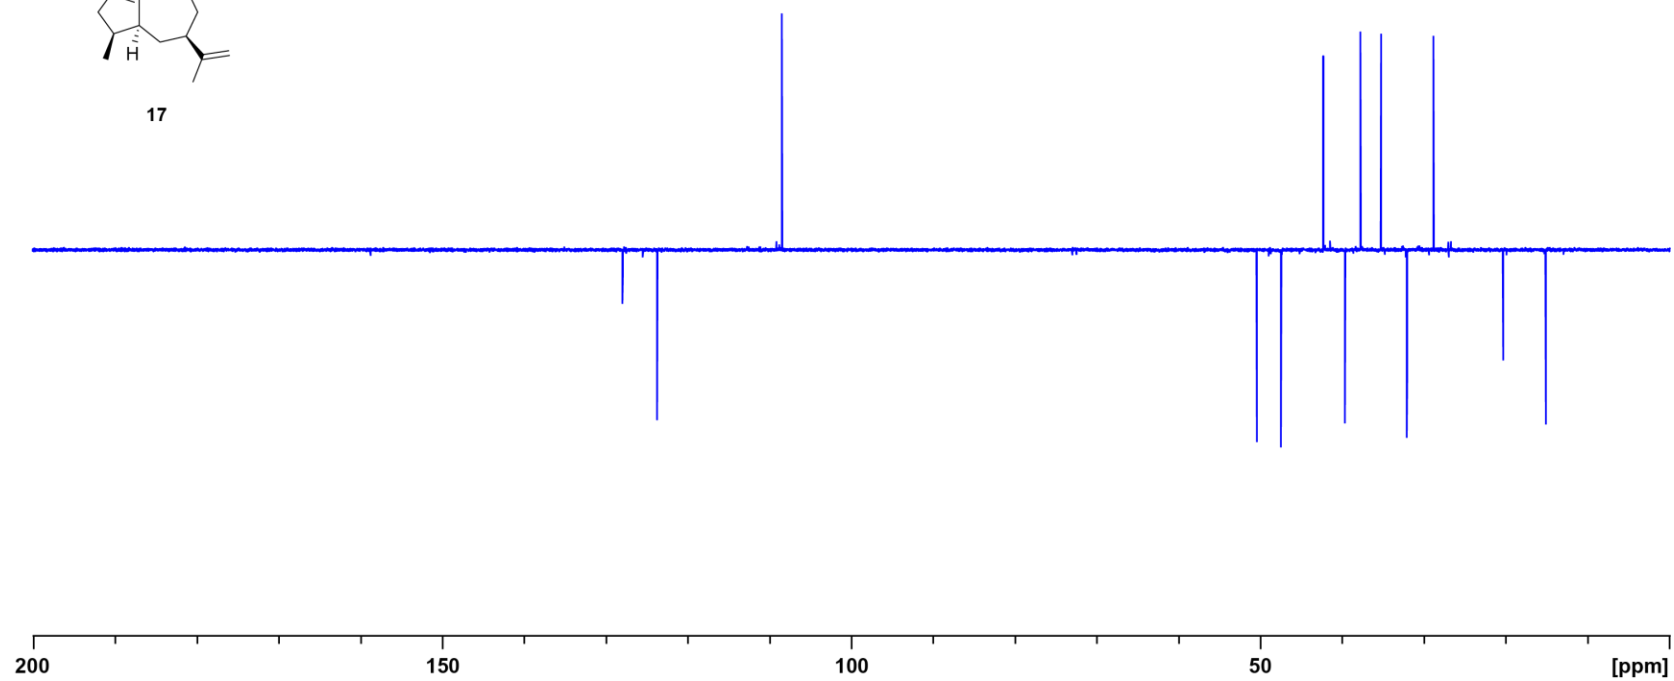

**Figure S31:**  $^{13}\text{C}$ -DEPT spectrum of **17** (176 MHz,  $\text{C}_6\text{D}_6$ ).

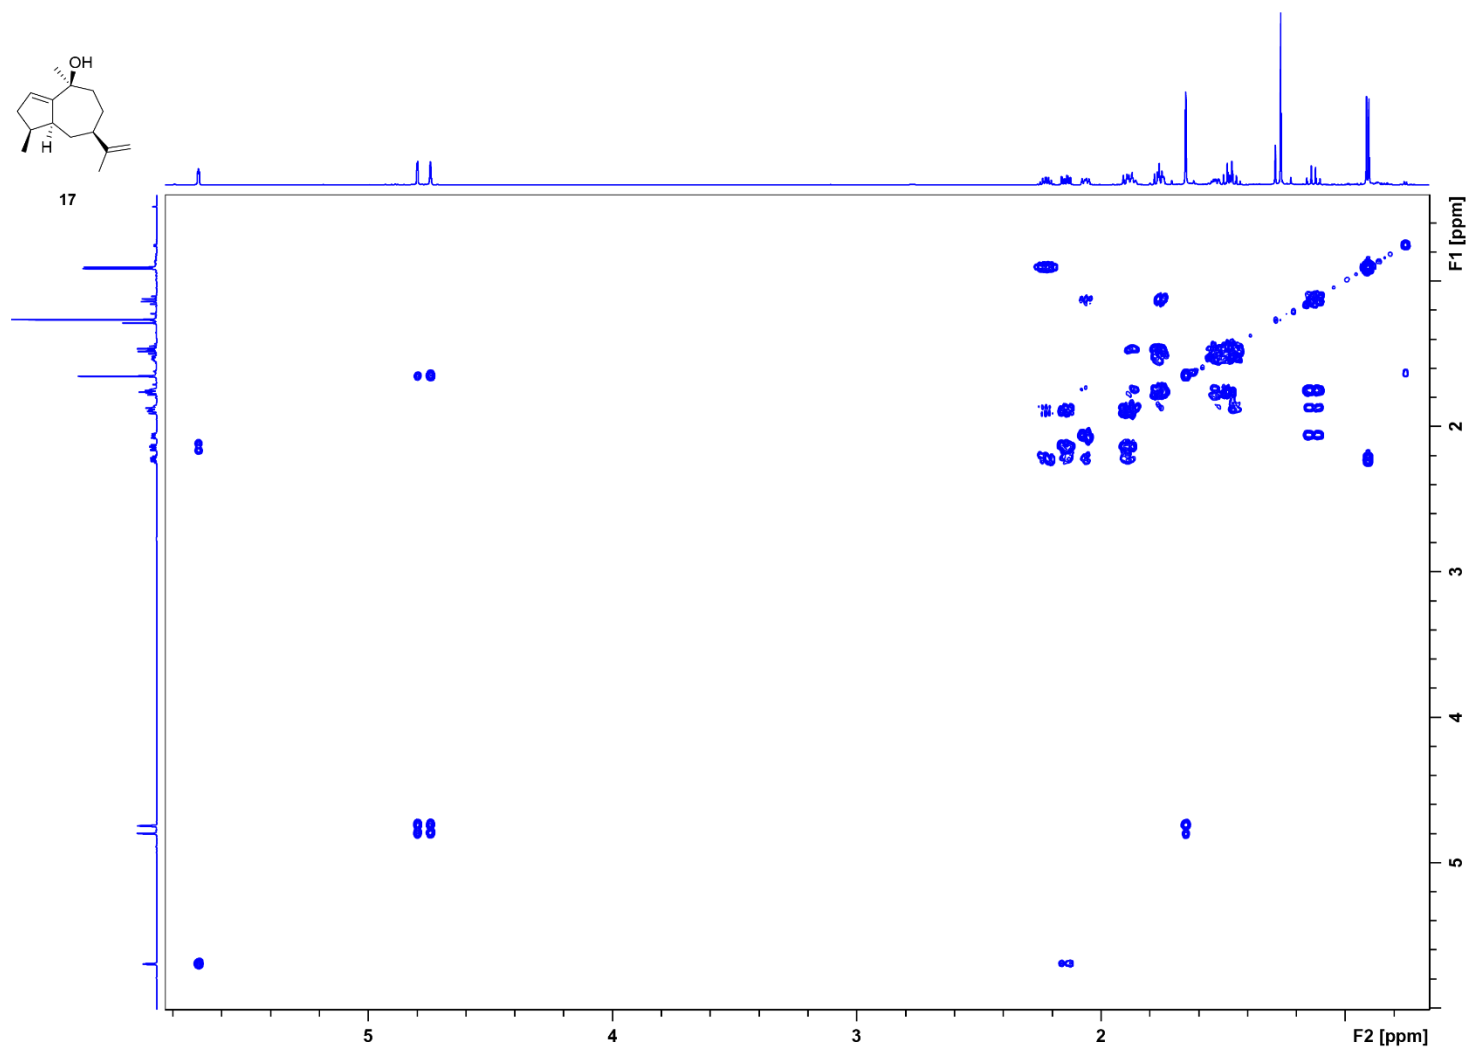

**Figure S32:**  $^1\text{H}$ - $^1\text{H}$ -COSY spectrum of **17** (700 MHz,  $\text{C}_6\text{D}_6$ ).

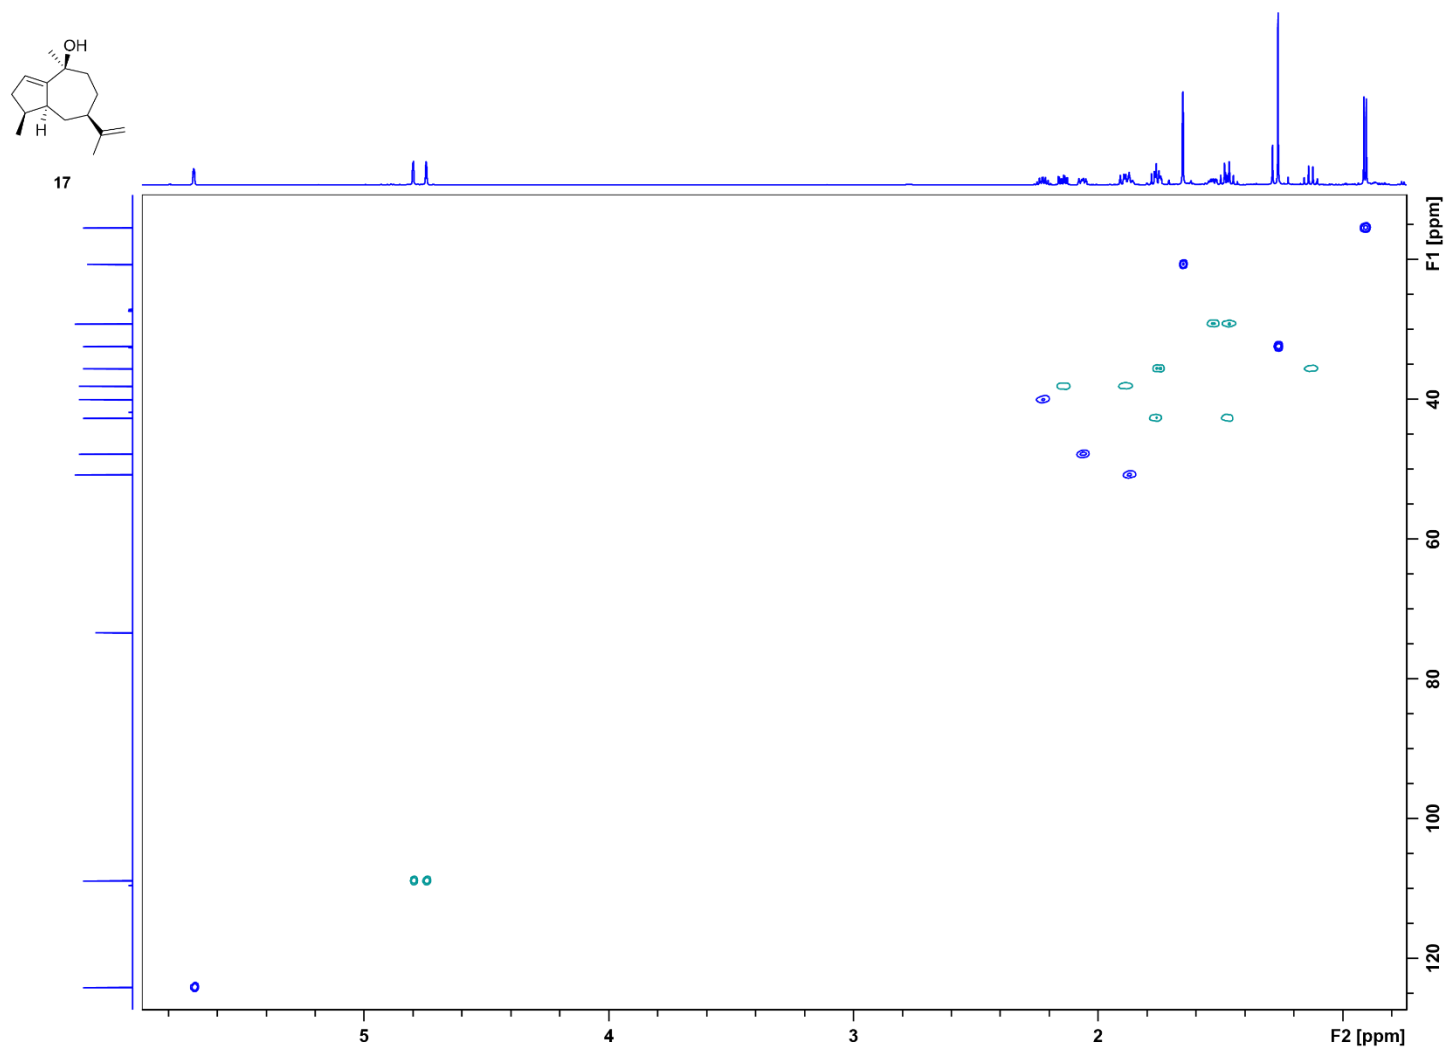

**Figure S33:** HSQC spectrum of **17** ( $\text{C}_6\text{D}_6$ ).

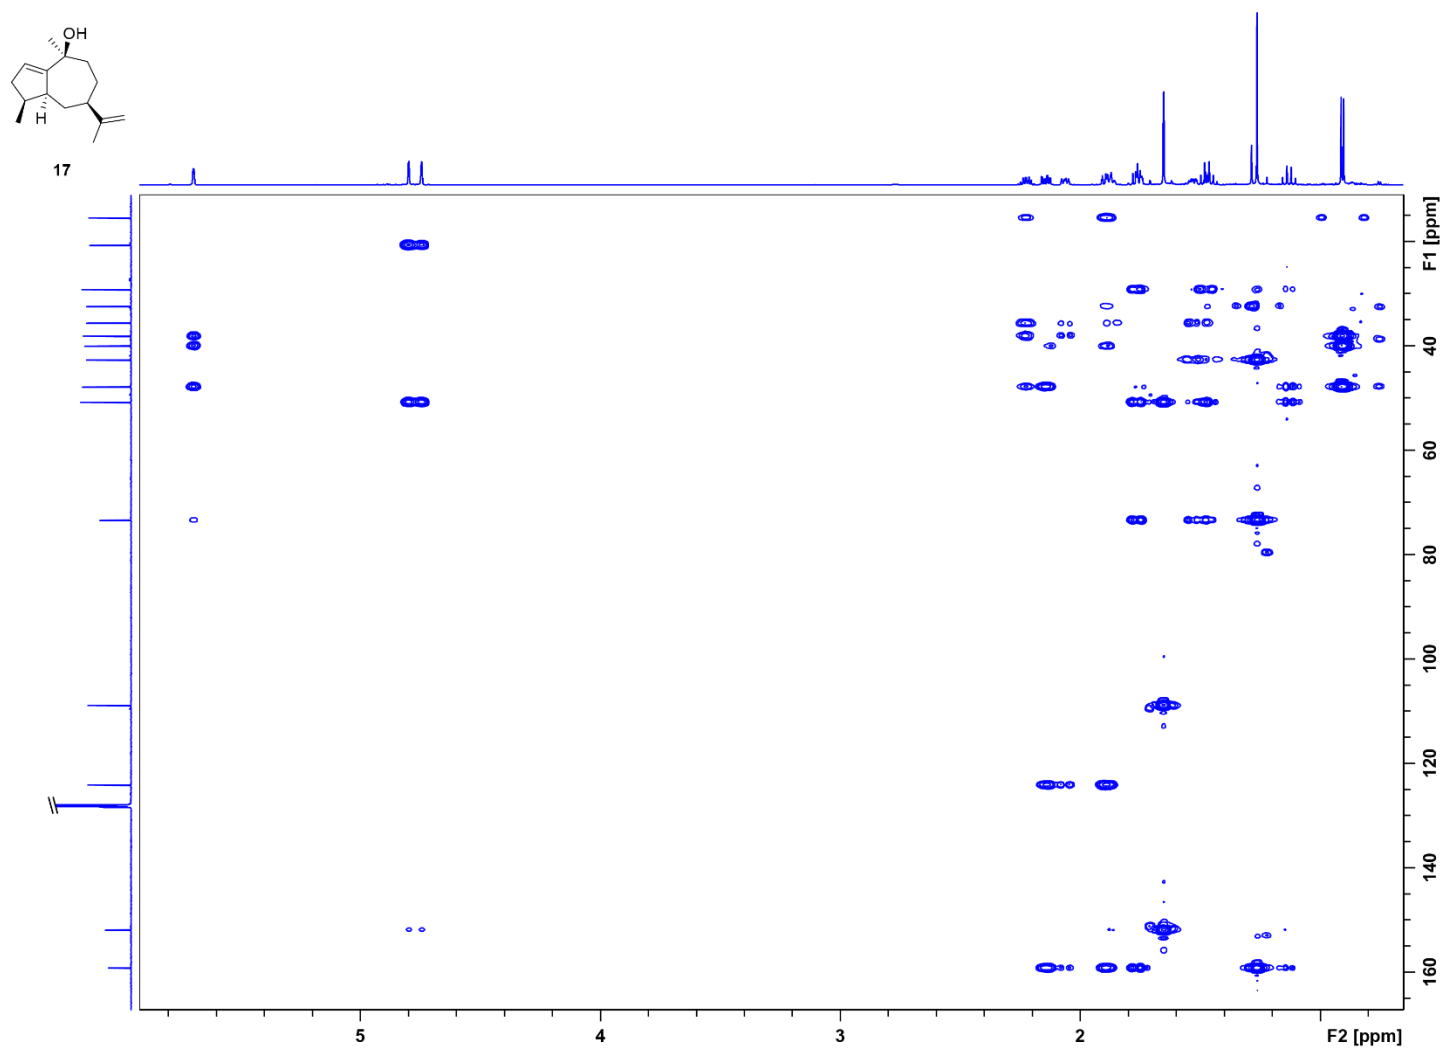

**Figure S34:** HMBC spectrum of **17** (C<sub>6</sub>D<sub>6</sub>).



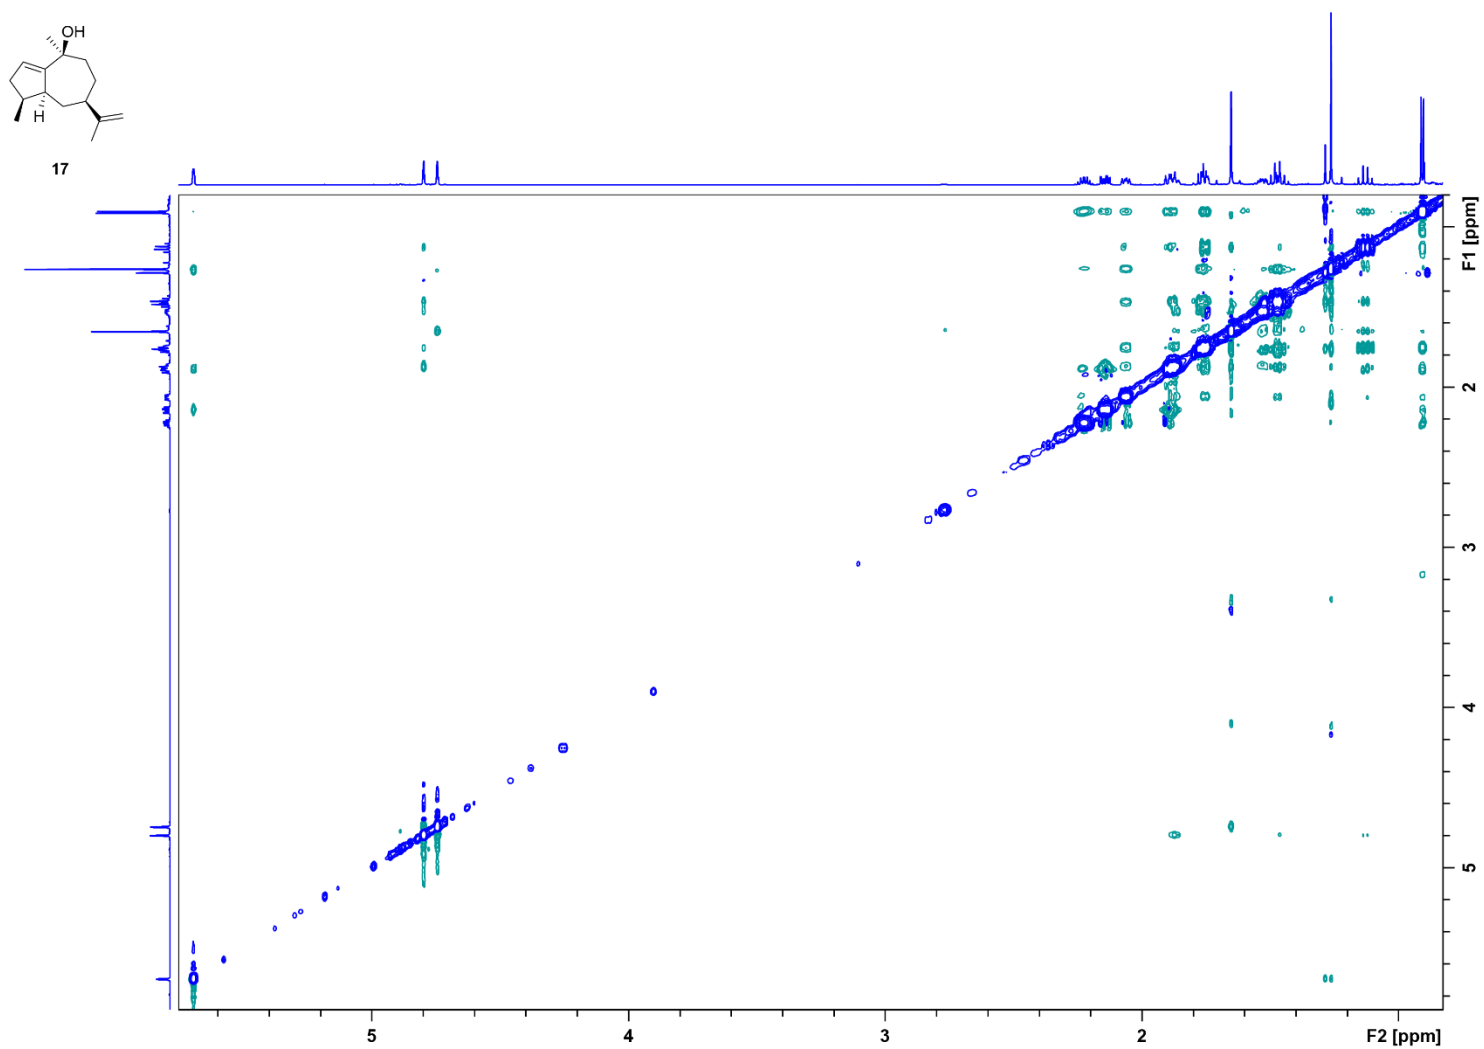

**Figure S35:** NOESY spectrum of **17** ( $C_6D_6$ ).

## References

1. Fulmer, G. R.; Miller, A. J. M.; Sherden, N. H.; Gottlieb, H. E.; Nudelman, A.; Stoltz, B. M.; Bercaw, J. E.; Goldberg, K. I. *Organometallics*, **2010**, *29*, 2176–2179.
2. Blessing, R. H. *Acta Crystallogr. A*, **1995**, *51*, 33–38.
3. Sheldrick, G. M. *Acta Crystallogr. Sect. C Struct. Chem.*, **2015**, *71*, 3–8.
4. Hooft, R. W. W.; Straver, L. H.; Spek, A. L. *J. Appl. Crystallogr.*, **2008**, *41*, 96–103.
5. Lauterbach, L.; Rinkel, J.; Dickschat, J. S. *Angew. Chem. Int. Ed.*, **2018**, *57*, 8280–8283.
6. Rabe, P.; Rinkel, J.; Nubbemeyer, B.; Köllner, T. G.; Chen, F.; Dickschat, J. S. *Angew. Chem. Int. Ed.*, **2016**, *55*, 15420–15423.
7. Rinkel, J.; Dickschat, J. S. *Org. Lett.*, **2019**, *21*, 2426–2429.
8. Rabe, P.; Barra, L.; Rinkel, J.; Riclea, R.; Citron, C. A.; Klapschinski, T. A.; Janusko, A.; Dickschat, J. S. *Angew. Chem. Int. Ed.*, **2015**, *54*, 13448–13451.
9. Bian, G.; Rinkel, J.; Wang, Z.; Lauterbach, L.; Hou, A.; Yuan, Y.; Deng, Z.; Liu, T.; Dickschat, J. S. *Angew. Chem. Int. Ed.*, **2018**, *57*, 15887–15890.
10. Rabe, P.; Rinkel, J.; Dolja, E.; Schmitz, T.; Nubbemeyer, B.; Luu, T. H.; Dickschat, J. S. *Angew. Chem. Int. Ed.*, **2017**, *56*, 2776–2779.
11. Klapschinski, T. A.; Rabe, P.; Dickschat, J. S. *Angew. Chem. Int. Ed.*, **2016**, *55*, 10141–10144.
12. Grimme, S.; Ehrlich, S.; Goerigk, L. *J. Comp. Chem.*, **2011**, *32*, 1456–1465.
13. Frisch, M. J. et al. Gaussian 16, Revision B.01, Gaussian, Inc., Wallingford CT, **2016**.
14. Hong, Y. J.; Tantillo, D. J. *J. Org. Chem.*, **2018**, *83*, 3780–3793.
15. Adamo, C.; Barone, V. *J. Chem. Phys.*, **1998**, *108*, 664–675.
16. Matsuda, S. P. T.; Wilson, W. K.; Xiong, Q. *Org. Biomol. Chem.*, **2006**, *4*, 530–543.
17. Lauterbach, L.; Goldfuss, B.; Dickschat, J. S. *Angew. Chem. Int. Ed.*, **2020**, *59*, 11943–11947.
18. Grimme, S.; *Chem. Eur. J.*, **2012**, *18*, 9955–9964.
19. Luchini, G.; Alegre-Requena, J. V.; Guan, Y.; Funes-Ardoiz, I.; Paton, R. S. GoodVibes v3.0.1, **2019**.
